# Supplementary material for: Experiences of women with cardiac disease in pregnancy: a systematic review and metasynthesis
Source: PubMed Central journal article supplement — BMJ Open. 2018 Sep 28;8(9):e022755. doi: 10.1136/bmjopen-2018-022755 (PMC6169742; doi:10.1136/bmjopen-2018-022755), 2018-09-28
Supplement: bmjopen-2018-022755.draft_revisions.pdf [file bmjopen-2018-022755.draft_revisions.pdf]

# BMJ Open

BMJ Open is committed to open peer review. As part of this commitment we make the peer review history of every article we publish publicly available.

When an article is published we post the peer reviewers' comments and the authors' responses online. We also post the versions of the paper that were used during peer review. These are the versions that the peer review comments apply to.

The versions of the paper that follow are the versions that were submitted during the peer review process. They are not the versions of record or the final published versions. They should not be cited or distributed as the published version of this manuscript.

BMJ Open is an open access journal and the full, final, typeset and author-corrected version of record of the manuscript is available on our site with no access controls, subscription charges or pay-per-view fees (<http://bmjopen.bmj.com>).

If you have any questions on BMJ Open's open peer review process please email [info.bmjopen@bmj.com](mailto:info.bmjopen@bmj.com)

# BMJ Open

## Experiences of women with cardiac disease in pregnancy: A systematic review and meta-synthesis

|                               |                                                                                                                                                                                                                                                                                                                                                                                                                                                                                                                                                                                                                                                               |
|-------------------------------|---------------------------------------------------------------------------------------------------------------------------------------------------------------------------------------------------------------------------------------------------------------------------------------------------------------------------------------------------------------------------------------------------------------------------------------------------------------------------------------------------------------------------------------------------------------------------------------------------------------------------------------------------------------|
| Journal:                      | <i>BMJ Open</i>                                                                                                                                                                                                                                                                                                                                                                                                                                                                                                                                                                                                                                               |
| Manuscript ID                 | bmjopen-2018-022755                                                                                                                                                                                                                                                                                                                                                                                                                                                                                                                                                                                                                                           |
| Article Type:                 | Research                                                                                                                                                                                                                                                                                                                                                                                                                                                                                                                                                                                                                                                      |
| Date Submitted by the Author: | 08-Mar-2018                                                                                                                                                                                                                                                                                                                                                                                                                                                                                                                                                                                                                                                   |
| Complete List of Authors:     | Dawson, Angela; University of Technology, Sydney, Australian Centre for Public and Population Health Research<br>Krastev , Yordanka; University of Technology, Sydney, Australian Centre for Public and Population Health Research<br>Parsonage, William; Royal Brisbane and Women's Hospital, ; Queensland University of Technology,<br>Peek, Michael; Australian National University, ANU Medical School<br>Lust, Karin; University of Queensland, Women's and Newborn Services, Royal Brisbane and Women's Hospital<br>Sullivan, Elizabeth; University of Technology Sydney Faculty of Health, Australian Centre for Public and Population Health Research |
| Keywords:                     | Pregnancy, cardiac disease, women centered care, shared decision-making, qualitative meta-synthesis                                                                                                                                                                                                                                                                                                                                                                                                                                                                                                                                                           |
|                               |                                                                                                                                                                                                                                                                                                                                                                                                                                                                                                                                                                                                                                                               |

SCHOLARONE™  
Manuscripts

1  
2  
3 **Experiences of women with cardiac disease in pregnancy: A systematic review and meta-**  
4  
5 **synthesis**  
6  
7  
8

9 Authors

10  
11  
12 Angela J. Dawson, BA (Hons), MA, PhD, PGDipHEd, PGDipPubHlth

13  
14 Australian Centre for Public and Population Health Research, Faculty of Health, University of  
15  
16 Technology Sydney, Sydney, Australia  
17

18  
19  
20  
21 Yordanka Krastev MD, PhD

22  
23 Australian Centre for Public and Population Health Research, Faculty of Health, University of  
24  
25 Technology Sydney; and Clinical Research Manager, MQ Health, Macquarie University,  
26  
27 Sydney, Australia  
28

29  
30  
31  
32 William Parsonage BMedSci (Hons), BM, BS, DM, MRCP, FRACP

33  
34 Senior Staff Cardiologist, Royal Brisbane and Women's Hospital, Clinical Director AusHSI,  
35  
36 IHBI, Queensland University of Technology, Brisbane, Australia  
37

38  
39  
40  
41 Michael J. Peek, MBBS, BSc (Med), PhD, FRANZCOG, FRCOG, CMFM, DDU

42  
43 Associate Dean and Professor of Obstetrics and Gynecology, Department of Obstetrics and  
44  
45 Gynecology, Medical School, College of Health and Medicine, The Australian National  
46  
47 University, Obstetrics and Gynaecology Administration, Women Youth and Children  
48  
49 Administration Offices, Centenary Hospital for Women and Children, Canberra Hospital,  
50  
51 Canberra, Australia  
52  
53  
54  
55  
56  
57  
58  
59  
60

1  
2  
3 Karin Lust, MBBS, FRACP  
4

5 Clinical Director, Obstetrics and Gynecology, General & Obstetric Physician, University of  
6  
7 Queensland, Women's and Newborn Services, Royal Brisbane and Women's Hospital,  
8  
9 Brisbane, Australia  
10  
11  
12  
13

14 Elizabeth A. Sullivan, MBBS, MD, MPH, MMed, FAFPHM

15  
16 Professor Public Health and Director, Australian Centre for Public and Population Health

17  
18 Research, Faculty of Health, University of Technology Sydney, Level 8, 235 Jones St, Ultimo

19  
20 NSW 2007, (PO Box 123), Sydney, Australia, +61 2 9514 3492, [Elizabeth.Sullivan@uts.edu.au](mailto:Elizabeth.Sullivan@uts.edu.au)  
21  
22

23 \*Corresponding author  
24  
25  
26  
27

28 Word count: 4,591  
29  
30  
31  
32  
33  
34  
35  
36  
37  
38  
39  
40  
41  
42  
43  
44  
45  
46  
47  
48  
49  
50  
51  
52  
53  
54  
55  
56  
57  
58  
59  
60

## ABSTRACT

### Objective

Cardiac disease in pregnancy is a leading cause of maternal death in high income countries world-wide. There is a lack of evidence-based guidelines to assist in planning and managing the healthcare of affected women. We conducted a qualitative meta-synthesis to explore the decision-making processes, supportive strategies and health care experiences of pregnant women with existing or acquired cardiac disease, or of affected women contemplating pregnancy.

### Method

We analysed qualitative peer-reviewed data to extract the experiences of women in the literature by a systematic search of five bibliographic databases using appropriate keywords. Identified publications were screened for duplication and eligibility against selection criteria, following the PRISMA guidelines. We then undertook a thematic analysis of the data relating to women's experiences extracted from each included publication.

### Results

Eleven studies from six countries were included in our meta-synthesis. Four emergent themes were revealed. Women with congenital and acquired heart disease identified situations where they had either taken charge of decision-making or lacked control, or experienced emotional uncertainty when making decisions. Some women were risk aware and determined to take care of themselves in pregnancy while others downplayed the risks. Women with heart disease acknowledged the importance of specific social support measures during pregnancy and after child birth and reported a spectrum of health care experiences.

### Conclusions

1  
2  
3 There is a lack of integrated and tailored healthcare services and information for women  
4  
5 with cardiac disease in pregnancy. The voice and experiences of women should inform new  
6  
7 evidence-based guidelines to support their decision-making needs. Shared decision-making  
8  
9 must consider communication across the clinical team. However, coordinated care can be  
10  
11 challenging due to the different specialists involved and the limited clinical evidence  
12  
13 concerning effective approaches to managing such complex care. Research is needed to  
14  
15 provide evidence for gendered approaches to shared decision-making in cardiac care.  
16  
17  
18  
19  
20

21 **Keywords:** Pregnancy, cardiac disease, women centered care, shared decision-making,  
22  
23 qualitative meta-synthesis.  
24  
25  
26  
27

## 28 **Article Summary**

### 29 **Strengths and limitations of this study**

- 30  
31  
32
- 33 • This is the first meta-synthesis of qualitative research to investigate the experiences  
34 of pregnant women with a spectrum of cardiac disease.  
35  
36
  - 37 • The small number of studies in this synthesis demonstrates the paucity of qualitative  
38 research in this area, particularly the voices of pregnant women with genetic  
39 conditions.  
40  
41  
42
  - 43 • The thematic analysis enabled patterns to be discerned that may be translated to  
44 cardiac disease in pregnancy and potentially other rare and chronic diseases in  
45 pregnancy.  
46  
47  
48
  - 49 • Our multi-disciplinary research team enabled a rich and detailed yet complex  
50 account of the extracted data.  
51  
52  
53  
54  
55  
56  
57  
58  
59  
60

## INTRODUCTION

Cardiac disease in pregnancy is a leading cause of maternal death in the developed world. In the United States, pregnancy related deaths due to cardiovascular disease were ranked as the leading category of death for 2011 to 2013 at 15.5% [1]. In the United Kingdom the rate of maternal deaths associated with cardiac disease has more than doubled from 1.0 in 1985 to 2.3 per 100,000 maternities in 2008 [2]. In Australia, cardiac disease in pregnancy has been the leading cause of indirect maternal deaths for almost 50 years [3 4], and a common cause of late maternal death [4 5].

Cardiac disease in pregnancy constitutes a broad spectrum of conditions, including: congenital (e.g. ventricular septal defect, transposition of the great vessels); genetic heart diseases (e.g. hypertrophic cardiomyopathy, long QT syndrome, Brugada syndrome); chronic arrhythmia conditions (e.g. Wolff Parkinson White syndrome); as well as heart diseases acquired before or during pregnancy (e.g. rheumatic heart disease, ischemic heart disease, peripartum cardiomyopathy). Heart transplants can also affect pregnancy outcomes.

Cardiac disease in pregnancy is associated with high rates of morbidity and hospitalization: 15% of women in Europe have been admitted for cardiac indications during pregnancy [6]. Approximately one in four women with cardiac disease in pregnancy are hospitalized during pregnancy, and overall cardiac disease in pregnancy is associated with increased likelihood of eclampsia, caesarean birth and postpartum hemorrhage [6]. For the baby there is an increased likelihood of stillbirth, preterm birth and acquired congenital disease [6]. The European Registry of Pregnancy and Cardiac Disease has reported significant

1  
2  
3 adverse perinatal outcomes for both mother and baby, most notably a maternal mortality  
4  
5 rate of one percent, which is more than 100 times the rate for women without cardiac  
6  
7 disease.  
8  
9

10  
11  
12 Confidential death enquiry data from the UK suggest there are an increasing number of  
13  
14 women who die from the combination of pregnancy and cardiac disease [2]. There are  
15  
16 several possible explanations for this observation including: the improved survival (~90%) of  
17  
18 children with congenital heart disease to adulthood; increased awareness and diagnosis of  
19  
20 genetic conditions; lifestyle factors (e.g. obesity) and older maternal age associated with  
21  
22 ischemic heart disease [7-9].  
23  
24  
25  
26  
27

28 Pre-conception counseling for women with chronic health issues is essential however, many  
29  
30 women with cardiac disease have been found to have high rates of unintended  
31  
32 pregnancies[10 11] that may indicate issues concerning health professional attitudes  
33  
34 towards providing such counseling and gaps in women's contraceptive knowledge and  
35  
36 available decision support.  
37  
38  
39  
40  
41

42 Despite clinical available guidelines [12-14] limited knowledge exists regarding the health  
43  
44 care, support and decision-making experiences of women with cardiac disease who are  
45  
46 pregnant, or contemplating pregnancy. Insights into women's experiences of planning and  
47  
48 undergoing pregnancy including their perceptions and satisfaction are critical to the  
49  
50 provision of health services, care and information.  
51  
52  
53  
54  
55  
56  
57  
58  
59  
60



1  
2  
3 This paper aims to synthesize the qualitative evidence and deliver insights on how to best  
4 support the decision-making of women with cardiac disease and the unique opportunity for  
5 health professionals to strengthen quality of cardiac care from pre-conception planning to  
6 the postnatal period.  
7  
8  
9  
10

## 11 12 13 14 **Methods**

### 15 16 *Data sources and search strategy*

17  
18 We undertook a qualitative systematic review of the literature and conducted a meta-  
19 analysis, following methods outlined by Thomas and Harden[15] to address the question:  
20  
21 What are the experiences of women with existing or acquired cardiac disease who are  
22 pregnant, or contemplating pregnancy? Our goal was to identify the decision-making  
23 processes and interactions with health professionals that women with cardiac disease in  
24 pregnancy experienced to gain insights into their resilience including coping strategies.  
25  
26  
27  
28  
29  
30  
31

32  
33  
34 We used the PRISMA statement (Figure 1) with a cut-off date of 2016. We searched the  
35 literature available in five, on-line, bibliographic databases: CINAHL Plus (1995–October  
36 2016); Embase (1996–October 2016); Ovid MEDLINE (1996–October 2016); PsycINFO (1984–  
37 October 2016) and the Joanna Briggs Institute Evidence Based Practice Database  
38 (1996–October 2016). Boolean operators (and, or, not) were used to refine our search with  
39 the following keywords: cardiac disease; pregnancy, pregnant women, decision-making and  
40 shared decision-making. Publications that met our selection criteria (Table 1) were further  
41 analyzed. We also searched for publications in Google Scholar and manually from the  
42 reference lists of key papers that identified an additional 19 relevant publications. See  
43 Appendix 1 for details of the bibliographic search strategy.  
44  
45  
46  
47  
48  
49  
50  
51  
52  
53  
54  
55  
56  
57  
58  
59  
60

**Figure1. PRISMA Flowchart of Cardiac Disease in Pregnancy**

**Table 1. Inclusion and exclusion criteria used to identify publications that involved women with cardiac disease in pregnancy**

| Inclusion criteria                                                                                                                                                                                                                                  | Exclusion Criteria                                                                                         |
|-----------------------------------------------------------------------------------------------------------------------------------------------------------------------------------------------------------------------------------------------------|------------------------------------------------------------------------------------------------------------|
| The experiences of women of reproductive age with existing or acquired cardiac disease in pregnancy who are, or have been pregnant or contemplating pregnancy. This included preconception, prenatal, intrapartum, perinatal and postnatal periods. | Women with cardiac disease who were not of reproductive age or who have not been or contemplated pregnancy |
| Qualitative studies                                                                                                                                                                                                                                 | Quantitative studies                                                                                       |
| Mixed methods design with a qualitative component                                                                                                                                                                                                   | Clinical studies of cardiac disease in pregnancy                                                           |
| Published in the English language                                                                                                                                                                                                                   | Non-English articles                                                                                       |

*Quality assessment and data extraction*

Nineteen potentially relevant publications were identified. Of these, eight were excluded because they were either not pertinent to our review or not peer-reviewed (e.g. PhD thesis).

The six qualitative publications and the qualitative components of the five mixed methods publications were appraised using the Critical Appraisal Skills Program (CASP) qualitative checklist [16] by two authors (AD and YK). Each paper was independently assessed using a table with the ten CASP questions to comment on the available detail on the data sampling,

1  
2  
3 collection and analysis processes and the coherence of the paradigm underpinning the study  
4  
5 involving the fit between data gathered and the conceptual work of analysis and  
6  
7 interpretation. Despite the methodological limitations of some papers including gaps in the  
8  
9 discussion of reflexivity and credibility all 11 papers were included in the meta-synthesis as  
10  
11 it was deemed that their strengths outweighed these issues. Data from the findings sections  
12  
13 of the publications that specifically concerned the preconception planning and pregnancy  
14  
15 experiences of women with cardiac disease, were extracted for further analysis. This  
16  
17 included direct quotes and text describing related findings.  
18  
19  
20

### 21 *Data analysis*

22  
23 The extracted text was coded 'line-by-line' by two authors (AD and YK) and then descriptive  
24  
25 categories developed that aligned with the original studies. The concepts from the  
26  
27 descriptive categories were grouped into themes and sub themes, and conceptual links  
28  
29 among themes were identified. Tables were used for this process. First text was marked  
30  
31 using color highlighting from each study and descriptors used to categories emergent  
32  
33 concepts within each paper. These descriptors were then compared across papers and  
34  
35 synthesized into one table. This led to the conflation of descriptive themes and the  
36  
37 development of emergent categories whose meaning was refined in order to answer the  
38  
39 review questions and address the aim of the study [17].  
40  
41  
42  
43

### 44 *Patient and Public Involvement*

45  
46 Qualitative patient data is the focus of this synthesis however, patients and the public were  
47  
48 not involved in the design of the study or analysis of the data. The results of this study will  
49  
50 inform the design of a research project that will involve the co-production of tools and  
51  
52 educational materials for women with cardiac disease in pregnancy.  
53  
54  
55  
56  
57  
58  
59  
60

## RESULTS

A summary of the methodology and findings of the 11 studies used in this review is given in Table 2. The studies were conducted across six countries: The United States of America (n=5), Australia (n=2), Sweden, (n=2), Canada (n=1), Norway (n=1) and Belgium (n=1). Six studies comprised qualitative designs [18-23] while five used mixed methods [24-28] (See Table 3).

For peer review only

1  
2  
3  
4  
5  
6  
7  
8  
9  
10  
11  
12  
13  
14  
15  
16  
17  
18  
19  
20  
21  
22  
23  
24  
25  
26  
27  
28  
29  
30  
31  
32  
33  
34  
35  
36  
37  
38  
39  
40  
41  
42  
43  
44  
45  
46  
47

**Table 2. Summary of the methodology and data of the 11 publications used in this review**

| Publication           | Methods                                                   | Aim                                                                                                                                                                                                               | Findings                                                                                                                                                                                                                                            |
|-----------------------|-----------------------------------------------------------|-------------------------------------------------------------------------------------------------------------------------------------------------------------------------------------------------------------------|-----------------------------------------------------------------------------------------------------------------------------------------------------------------------------------------------------------------------------------------------------|
| Andersen et al. [18]  | Qualitative: in-depth face to face interviews             | To investigate psychosocial aspects of living with Long QT Syndrome(LQTS); to identify LQTS patients’ daily challenges and coping strategies; and to describe LQTS patients’ experience with healthcare services. | The main concern of the patients with LQTS was that something might happen to their children and grandchildren. Participants favored early genetic testing, and the provision of early and gradually presented information about LQTS for children. |
| Claessens et al. [19] | Qualitative: unstructured, in-depth interviews            | To explore the lived experiences of adult congenital heart disease patients.                                                                                                                                      | The central theme of the patients’ lived experiences was “feeling different”. Patients struggled constantly with themselves and with their environment to be accepted as normal.                                                                    |
| Dekker et al. [22]    | Publicly available narratives in 3 online support groups. | To describe the experience of women diagnosed with Peripartum Cardiomyopathy (PPCM).                                                                                                                              | Nearly 40% of women felt that they were dismissed by health-care providers. Women had difficulty caring for their newborns during the postnatal period, and they struggled with the medical advice they received to not conceive again.             |

| Publication           | Methods                                                                      | Aim                                                                                                                                                    | Findings                                                                                                                                                                                                                                                                                                                                                                                                                                                               |
|-----------------------|------------------------------------------------------------------------------|--------------------------------------------------------------------------------------------------------------------------------------------------------|------------------------------------------------------------------------------------------------------------------------------------------------------------------------------------------------------------------------------------------------------------------------------------------------------------------------------------------------------------------------------------------------------------------------------------------------------------------------|
| Gantt 1992 [21]       | Qualitative: unstructured face to face interviews; Grounded-Theory           | To generate an understanding of, and theories about, the lives of women with congenital heart disease.                                                 | Lack of information related to women's bodies and reproductive issues ("growing up female"). Over involvement of mothers and health care professionals in the affairs of the child's and woman's body, resulting in decreased ownership of the body by the woman ("living against the body"). Poor self-esteem, self-concept, and body image ("growing up heartsick"). A need for various types of counselling for women with congenital heart disease was identified. |
| Gantt [20]            | Qualitative descriptive design with unstructured interviews.                 | To study the effect of congenital heart diseases on the mother–daughter relationship.                                                                  | Overriding theme of the study was normalizing in the face of chronic illness, with a tendency by the mothers and daughters to focus on their lives instead of their relationship with one another.                                                                                                                                                                                                                                                                     |
| Hess et al. 2010 [26] | Descriptive study: a survey of open-ended and Likert-type questions.         | To determine the benefits of participation in the online support group for peripartum cardiomyopathy based on a survey of active members of the group. | One of the most important issues facing women with peripartum cardiomyopathy is future childbearing. The benefits of participation in the online support group included getting and sharing information, exchanging stories, being understood by other women and gaining hope.                                                                                                                                                                                         |
| Hess et al. 2012 [27] | A mixed method design. Analysis of social media postings made by 156 people. | To describe the contents of postings made on the My Space® peripartum cardiomyopathy support group Website by women with peripartum cardiomyopathy.    | The subject of pregnancy subsequent to the diagnosis of peripartum cardiomyopathy was mentioned 102 times (amongst 247 posts), making it an issue that was foremost in the minds of many women.                                                                                                                                                                                                                                                                        |

| Publication | Methods | Aim | Findings |
|-------------|---------|-----|----------|
|-------------|---------|-----|----------|

1  
2  
3  
4  
5  
6  
7  
8  
9  
10  
11  
12  
13  
14  
15  
16  
17  
18  
19  
20  
21  
22  
23  
24  
25  
26  
27  
28  
29  
30  
31  
32  
33  
34  
35  
36  
37  
38  
39  
40  
41  
42  
43  
44  
45  
46  
47

| Publication                      | Methods                                                                                              | Aim                                                                                                                                                                                                                                                          | Findings                                                                                                                                                                                                                                                                                   |
|----------------------------------|------------------------------------------------------------------------------------------------------|--------------------------------------------------------------------------------------------------------------------------------------------------------------------------------------------------------------------------------------------------------------|--------------------------------------------------------------------------------------------------------------------------------------------------------------------------------------------------------------------------------------------------------------------------------------------|
| Ngu et al. [25]                  | A retrospective descriptive study.<br>Mixed method study                                             | To assess the perceptions of women with congenital heart disease regarding the severity of their cardiac abnormality and its implications in pregnancy, and whether their motivations to conceive were like those of women without congenital heart disease. | The women’s personal experience of successfully living with their heart condition influenced their perception of the pregnancy risks.<br>Women with congenital heart disease were concerned about the health risks associated with their congenital heart disease and that of their child. |
| Ngu et al. [24]                  | Case Studies<br>Mixed method study.                                                                  | To understand the motivations of women with congenital heart disease to bear children, and to assess if there are any differences between the cohort with low risk and those with high risk heart disease.                                                   | Women with high risk (moderate to severe) congenital heart disease appeared to have similar motivations for conceiving as women with low-risk (mild) congenital heart disease Their drive for motherhood appeared to be stronger than the drive for self-care.                             |
| Patel, Berg et al [28]           | Mixed method study: qualitative face to face and telephone interviews and review of medical records. | To explore and describe women’s experiences of symptoms in peripartum cardiomyopathy.                                                                                                                                                                        | Being caught in a spider web comprising the invasion of the body by experienced symptoms and feeling of helplessness.                                                                                                                                                                      |
| Patel, Schaufelberge et al. [23] | Unstructured qualitative interviews                                                                  | To explore women's experiences of health care while being diagnosed with peripartum cardiomyopathy.                                                                                                                                                          | The main theme was, 'Exacerbated Suffering', expressed in three subthemes; 'not being cared about', 'not being cared for' and 'not feeling secure'.                                                                                                                                        |

**Table 3. Summary of the conditions, participants, study locations and year of publication of the 11 publications used in this review**

| Publication           | Condition                                                                                                                                                                                                      |                              | Country & Year | Number of participants                                                                                                                                                                   | Age range (years)                                                                           |
|-----------------------|----------------------------------------------------------------------------------------------------------------------------------------------------------------------------------------------------------------|------------------------------|----------------|------------------------------------------------------------------------------------------------------------------------------------------------------------------------------------------|---------------------------------------------------------------------------------------------|
|                       | Congenital heart disease                                                                                                                                                                                       | Other acquired heart disease |                |                                                                                                                                                                                          |                                                                                             |
| Andersen et al. [18]  | Long QT Syndrome                                                                                                                                                                                               |                              | Norway, 2008   | Adults (n=7): 4 women; 3 men                                                                                                                                                             | 23-76 years                                                                                 |
| Claessens et al. [19] | Moderate or severe heart defects: such as Tetralogy of Fallot; univentricular heart; VSD and aortic valve stenosis; transposition of the great arteries.                                                       |                              | Belgium, 2005  | Adult patients (n=12): 6 women; 6 men                                                                                                                                                    | 25-40 years                                                                                 |
| Dekker et al. [22]    |                                                                                                                                                                                                                | Peripartum Cardiomyopathy    | USA, 2016      | Adult women (n=92): 1 <sup>st</sup> pregnancy (n=49), 2 <sup>nd</sup> pregnancy (n=24), 3 <sup>rd</sup> pregnancy (n=10), >4 <sup>th</sup> higher pregnancy (n=8), and unreported (n=1). | 17-41 years                                                                                 |
| Gantt 1992 [21]       | Transposition of the great vessels (TOGV), pulmonary atresia, atrial septal defect (ASD), double outlet right ventricle, pulmonary stenosis, truncus arteriosus, and coarctation of the aorta.                 |                              | USA, 1992      | Adolescent, young adults (n=13).                                                                                                                                                         | 13-15 years old (n=3), 16-18 years old (n=4), 19-21 years old (n=3), 22-28 years old (n=3). |
| Gantt 2002 [20]       | One woman with childhood rheumatic fever, one adolescent woman had a heart murmur only. All others had congenital heart diseases of varying types and severity that had been surgically repaired or palliated. |                              | USA, 2002      | Adults and children (n=22): 11 mothers and 11 daughters.                                                                                                                                 | Daughter's school-age, the youngest was 9 years. Mothers' age range from 30-60 years.       |



1  
2  
3  
4  
5  
6  
7  
8  
9  
10  
11  
12  
13  
14  
15  
16  
17  
18  
19  
20  
21  
22  
23  
24  
25  
26  
27  
28  
29  
30  
31  
32  
33  
34  
35  
36  
37  
38  
39  
40  
41  
42  
43  
44  
45  
46  
47

| Publication           | Condition                                                                                                                                                                                                                                                                                                                  |                              | Country & Year  | Number of participants                                                                         | Age range (years)                                                                                                                  |
|-----------------------|----------------------------------------------------------------------------------------------------------------------------------------------------------------------------------------------------------------------------------------------------------------------------------------------------------------------------|------------------------------|-----------------|------------------------------------------------------------------------------------------------|------------------------------------------------------------------------------------------------------------------------------------|
|                       | Congenital heart disease                                                                                                                                                                                                                                                                                                   | Other acquired heart disease |                 |                                                                                                |                                                                                                                                    |
| Hess et al. 2010 [26] |                                                                                                                                                                                                                                                                                                                            | Peripartum Cardiomyopathy    | USA, 2010       | Adult women (n=12). 7 women didn't have other children prior to the diagnosis.                 | 19 to 34 years                                                                                                                     |
| Hess et al. 2012 [27] |                                                                                                                                                                                                                                                                                                                            | Peripartum Cardiomyopathy    | USA, 2012       | Adults (n=156). 148 (95%) women with PPCM; 8 (5%) husbands, mothers, sisters and grandmothers. | Mean age 27 years.                                                                                                                 |
| Ngu et al. [25]       | Mild: pulmonary atresia; moderately large VSD; transposition of the great vessels; coarctation of aorta; bicuspid aortic valve; Ebstein's anomaly of tricuspid valve.<br>Moderate: Tetralogy of Fallot; mitral valve dysplasia, sub aortic stenosis.<br>Severe: VSD; aortic valve stenosis; double outlet right ventricle. |                              | Australia, 2014 | Women with (n = 20) or without (n = 20) CHD aged >18 years, who had ≥1 successful pregnancy.   | Women with congenital heart disease- mean age 32.6 ± 5.3 years; Women without congenital heart disease- mean age 33.9 ± 5.2 years. |

For peer review only

| Publication                      | Condition                                                                                                                                                                                                                                                                                                                 |                              | Country & year  | Number of participants                                                                                                                                                                                                   | Age range (years)                                                                                                 |
|----------------------------------|---------------------------------------------------------------------------------------------------------------------------------------------------------------------------------------------------------------------------------------------------------------------------------------------------------------------------|------------------------------|-----------------|--------------------------------------------------------------------------------------------------------------------------------------------------------------------------------------------------------------------------|-------------------------------------------------------------------------------------------------------------------|
|                                  | Congenital heart disease                                                                                                                                                                                                                                                                                                  | Other acquired heart disease |                 |                                                                                                                                                                                                                          |                                                                                                                   |
| Ngu et al. [24]                  | Mild: pulmonary atresia; moderately large VSD; transposition of the great vessels; coarctation of aorta; bicuspid aortic valve; Ebstein's anomaly of tricuspid valve.<br>Moderate: Tetralogy of Fallot; mitral valve dysplasia; sub aortic stenosis.<br>Severe: VSD; aortic valve stenosis; double outlet right ventricle |                              | Australia, 2014 | Women with mild CHD (n = 10) with:<br>1 child (n = 4)<br>2 children (n = 4)<br>3 children (n = 2).<br>Women with moderate to severe CHD (n = 10) with:<br>1 child (n = 5);<br>2 children (n = 3);<br>3 children (n = 2). | Women with mild –CHD-mean age 35.8 ± 5.9 years,<br>Women with moderate to severe CHD - mean age 28.9 ± 3.5 years. |
| Patel, Berg et al. [28]          |                                                                                                                                                                                                                                                                                                                           | Peripartum Cardiomyopathy    | Sweden, 2016    | 19 women                                                                                                                                                                                                                 | 28–46 years*                                                                                                      |
| Patel, Schaufelberge et al. [23] |                                                                                                                                                                                                                                                                                                                           | Peripartum Cardiomyopathy    | Sweden, 2016    | 19 women                                                                                                                                                                                                                 | 28–46 years*                                                                                                      |

\*Separate studies drawing upon data from the same cohort of women

1  
2  
3  
4  
5  
6  
7  
8  
9  
10  
11  
12  
13  
14  
15  
16  
17  
18  
19  
20  
21  
22  
23  
24  
25  
26  
27  
28  
29  
30  
31  
32  
33  
34  
35  
36  
37  
38  
39  
40  
41  
42  
43  
44  
45  
46  
47  
48  
49  
50  
51  
52  
53  
54  
55  
56  
57  
58  
59  
60

Four themes and seven sub-themes emerged from our meta-analysis, which are summarized in Table 4 and described in more detail below.

For peer review only

**Table 4. Frequency of themes in women with cardiac disease in pregnancy identified in the literature**

| Reference                           | Themes: | Women's autonomy and control |                                  |                 |                                          | Self-care and risk awareness in pregnancy | Social support for decision-making | Health care experiences              |                          |                 |
|-------------------------------------|---------|------------------------------|----------------------------------|-----------------|------------------------------------------|-------------------------------------------|------------------------------------|--------------------------------------|--------------------------|-----------------|
|                                     |         | Sub-themes:                  | Taking charge of decision-making | Lack of control | Emotional uncertainty of decision-making |                                           |                                    | Helplessness, fear and vulnerability | Health information needs | Responsive care |
| <b>Congenital heart disease</b>     |         |                              |                                  |                 |                                          |                                           |                                    |                                      |                          |                 |
| Andersen et al [18]                 | ✓       | ✓                            | ✓                                | ✓               | ✓                                        | ✓                                         | ✓                                  |                                      |                          |                 |
| Claessens et al. [19]               | ✓       |                              | ✓                                | ✓               |                                          |                                           |                                    |                                      |                          |                 |
| Gantt 2002 [20]                     | ✓       |                              |                                  |                 | ✓                                        |                                           |                                    |                                      |                          |                 |
| Gantt 1992 [21]                     | ✓       |                              | ✓                                |                 | ✓                                        |                                           |                                    | ✓                                    |                          | ✓               |
| Ngu et al. [24]                     |         |                              |                                  |                 | ✓                                        | ✓                                         |                                    |                                      | ✓                        |                 |
| Ngu et al. [25]                     | ✓       |                              |                                  |                 | ✓                                        | ✓                                         |                                    |                                      |                          |                 |
| <b>Other acquired heart disease</b> |         |                              |                                  |                 |                                          |                                           |                                    |                                      |                          |                 |
| Dekker et al. [22]                  |         |                              | ✓                                | ✓               | ✓                                        |                                           |                                    | ✓                                    | ✓                        | ✓               |
| Hess et al. 2010 [26]               | ✓       |                              |                                  |                 |                                          | ✓                                         | ✓                                  | ✓                                    |                          | ✓               |
| Hess et al. 2012 [27]               | ✓       |                              |                                  |                 |                                          |                                           | ✓                                  |                                      |                          | ✓               |
| Patel, Berg et al. [28]             |         |                              |                                  | ✓               | ✓                                        |                                           |                                    |                                      |                          |                 |
| Patel, Schaufelberge et al. [23]    |         |                              |                                  |                 | ✓                                        |                                           |                                    |                                      | ✓                        | ✓               |

## Women's autonomy and control

### *Taking charge of decision-making*

Some women expressed their determination to take control and make their own decisions regarding their pregnancies. One woman was resolute to try to fall pregnant and if unsuccessful wanted to consider other options: "I want to give birth to at least one child. I want to have the opportunity to do that, then later I can adopt ..." [18]. Another woman became pregnant two months after her diagnosis of heart disease and described being "told to terminate her pregnancy" but she "refused" [27]. Another woman felt she "had lived a good life" and her disease "could not be considered a reason for terminating a pregnancy" [18]. The positive thinking that "life isn't over just because you have peripartum cardiomyopathy" and the possibility of having more children was a key factor driving the decision of women who went through another pregnancy and "received a beautiful little girl in exchange" [26].

Women's trust in their clinicians and their experiences of successfully adapting to their congenital cardiac disease by developing coping mechanisms, played a role in their desire to make their own decisions and proceed with their pregnancies [25]. Some women felt that they had to take responsibility not only for their own health, but also for that of future generations. These women undertook genetic testing as early as possible [18] to prevent giving birth to a child with congenital heart disease [21].

Women desired to take control and live a "normal life" [20 24], participate in social activities and "fit in" [21]. This often stemmed from childhood experiences of being excluded and "feeling different" [21]. For some women, this motivated them to make their own decisions

1  
2  
3 and to take on new and different activities as a means of coping “ I do these things just to  
4  
5 challenge those boundaries, limitations” [19].  
6  
7

### 8 9 *A lack of control*

10  
11 In contrast, a lack of autonomy and control was noted by women in relation to pregnancy  
12  
13 decision-making. Some women believed that someone else would decide whether they  
14  
15 should become pregnant in response to being “told right from the beginning not to have any  
16  
17 more children” [22]. Another woman felt that she had no choice and could not take the risk  
18  
19 and have her family shoulder the burden of another episode of heart failure [21]. Others  
20  
21 described feeling how social pressure and the judgment of others interfered with their  
22  
23 decision to have more children: "you're not supposed to get pregnant when you have  
24  
25 congenital heart disease” [21]. Another woman, who already had a child diagnosed with  
26  
27 heart condition, feared being perceived as “selfish” [18].  
28  
29  
30  
31  
32  
33  
34

35 For some of the women, their heart disease defined and dominated their decision-making  
36  
37 [18]. One woman talked of how everything in her life "came down to the heart" [21]. While  
38  
39 another described the tension between the control their disease had over them, and their  
40  
41 own autonomy to make decisions, including those about pregnancy “I do make plans and  
42  
43 that sort of thing, but I don't dare to carry them out. Now I understand that ...I must start  
44  
45 something independently ...but I'm scared” [19]. A lack of autonomy and control was  
46  
47 discussed by women in relation to financial hardship. Some women said that they had  
48  
49 registered for disability payments after their diagnosis and were concerned that they would  
50  
51 not be able to work after giving birth and contribute to the household income due to impact  
52  
53  
54  
55  
56  
57  
58  
59  
60

1  
2  
3 the pregnancy would have on their physical and mental health. As a result, these women  
4  
5 felt they would be financially dependent upon others [22].  
6  
7  
8

### 9 10 *The emotional uncertainty of decision-making*

11  
12 In three studies, women described the emotional uncertainty of their pre-conception  
13  
14 decision-making in highly emotional terms, where they were at a loss regarding what to do  
15  
16 [18 19] with one women asked 'Is it worth it having a baby?' [28]. Women expressed  
17  
18 feelings of being depressed, devastated, experiencing "emotional torture ",feeling  
19  
20 "hysterical" when they were diagnosed with cardiac disease and advised by their doctors  
21  
22 against future pregnancies [22]. These circumstances required them to re-think their  
23  
24 situation [22]. Several women described the decisions regarding pregnancy and childbirth as  
25  
26 extremely difficult for them [18] due to uncertainty regarding the progression and prognosis  
27  
28 of their disease [19].  
29  
30  
31

### 32 33 *Helplessness, fear and vulnerability*

34  
35 The feeling of helplessness and loss of control in relation to the development of cardiac  
36  
37 disease symptoms both during pregnancy, birth and postpartum was expressed by one  
38  
39 woman as like "being caught in a spider web" [28], or being trapped by their condition and  
40  
41 fearful about future pregnancies [20]. Another woman described being pregnant as a  
42  
43 "constant struggle between hope and helplessness" [28]. There was a mix of physical and  
44  
45 emotional symptoms when women described the suffering of their own illness and the  
46  
47 inability to take care of their newborn baby [22 23].  
48  
49  
50  
51

52  
53 Women feared dying. They were deeply concerned that they would not survive the  
54  
55 pregnancy and that they would leave their child motherless, [21 24 25] or be left disabled  
56  
57  
58  
59

1  
2  
3 and unable to care for their newborn [24]. They were worried about passing on heart  
4  
5 disease to their unborn baby [18 24], giving birth to a baby with a heart abnormality, [21 24]  
6  
7 and the effect that medications might have on their baby [21]. These fears deeply affected  
8  
9 women, so much so that some continued to relive the distress brought on by the diagnosis  
10  
11 of cardiac disease in pregnancy through flashbacks, years after the birth of their child [23].  
12  
13

### 14 15 16 17 **Self-care and risk awareness in pregnancy**

18  
19 Risk awareness and desire for motherhood were discussed in four of the papers [18 24 25  
20  
21 27]. In a study by Andersen et al. [18] women with Long QT syndrome reported being  
22  
23 frustrated not to know how much danger to their health a pregnancy might impose. They  
24  
25 felt that if they took the risk to become pregnant, the decision was theirs.  
26  
27

28  
29  
30 For another group of women with congenital heart disease, the determination to have a  
31  
32 child was so strong, that it outweighed self-care considerations. Despite being aware of the  
33  
34 complications during pregnancy, 10 of the 20 women in the study perceived their disease to  
35  
36 be less severe than that reported by their clinicians. These women therefore down played  
37  
38 the seriousness of their condition that was found to be related to a reliance on the care of  
39  
40 their health professionals, and a belief that medical and surgical care would result in a  
41  
42 successful pregnancy and birth outcome. This distorted view of their condition was also  
43  
44 linked to their quality of life which they felt was good [24].  
45  
46  
47  
48  
49  
50

### 51 **Social support for decision-making**

52  
53 A feeling of empowerment and hope provided through social support was clearly  
54  
55 demonstrated in several publications analyzed in this review. Women using an online  
56  
57  
58  
59



1  
2  
3 support forum felt that “It is beneficial to know that you are not alone” [26]. Women  
4  
5 identified the benefits of “friendly, open arms” that “gave me hope”, [26] and others  
6  
7 iterated “there is always hope” [27]. Some women shared the positive feeling of being able  
8  
9 to talk to someone who could understand them without judgment and to shared  
10  
11 experiences. Women found peer-education to be an important part of managing their life  
12  
13 and living with heart failure [26]. Another woman described the distress of having to face  
14  
15 her pregnancy decision-making alone, as she lacked support from her family, who did not  
16  
17 want her to take any risks [18].  
18  
19  
20  
21  
22

### 23 **Health care experiences**

#### 24 *Health information needs*

25  
26 Our review revealed gaps in the understanding of women’s health information knowledge  
27  
28 or needs by clinicians. Several women felt that they had received inadequate information  
29  
30 from clinicians. Only six of the participants in one study had information about  
31  
32 contraception as it related to their heart disease [21]. One woman stated that she was  
33  
34 “shocked” that none of her clinicians had discussed the severity of her condition with her: “I  
35  
36 thought I was completely fine. I didn’t know I wasn’t supposed to have any more kids” [26].  
37  
38 The need for appropriate information delivery and counselling was highlighted by one  
39  
40 women who recounted the time of extreme panic when her doctor delivered her diagnosis:  
41  
42 “With no family present, he told me that I might need a heart transplant and that I was  
43  
44 finished being pregnant” [22].  
45  
46  
47  
48  
49  
50  
51  
52

#### 53 *Responsive care*

1  
2  
3 Many women felt that they had received supportive care from their healthcare team, were  
4 grateful and praised the skills and responsiveness of their clinicians. One woman expressed  
5 this by stating that the “*world's elite team was there for me during the labour*” [23]. Another  
6 group of 13 women shared how grateful they were to the nurses who brought their  
7 newborn babies to the intensive care unit where they were staying, and recognized the  
8 separation concerns [22]. Women also reported feeling “secure” when provided with the  
9 phone number of a cardiac nurse or cardiologist to call if they were worried or had  
10 questions. Women valued check-ups as these gave them “hope” [23]. Women trusted their  
11 clinicians and perceived them to be compassionate professionals who would carefully  
12 monitor and support them throughout their pregnancy [24].  
13  
14  
15  
16  
17  
18  
19  
20  
21  
22  
23  
24  
25  
26  
27

### 28 *Listening to women*

29  
30 Women commented on situations where clinicians had overly relied on the results of  
31 objective tests and careful monitoring throughout their pregnancy to manage their  
32 healthcare, rather than listening to them and taking their experiences and feelings into  
33 consideration [23]. Some women reported that their voices were dismissed: “they didn’t  
34 seem to care.” [22]; “they did not listen to me”; and “did not respect my wish.” [23]. As a  
35 result, women felt ignored, or misjudged, which caused sadness, insecurity and  
36 disappointment in the service provided by their healthcare professionals. Women expressed  
37 feeling rejected by clinicians and felt that they were treated “like a drug addict; “like a pile  
38 of garbage” [23]; “like a baby” [21]. One woman suggested that clinicians learn more about  
39 the symptoms of their condition and take the complaints of their patients seriously [26].  
40  
41  
42  
43  
44  
45  
46  
47  
48  
49  
50  
51  
52  
53  
54

## 55 **DISCUSSION**

1  
2  
3 This is the first meta-synthesis of qualitative research to investigate the experiences of  
4  
5 pregnant women with a spectrum of cardiac disease. It provided insight into the continuum  
6  
7 of preconception, pregnancy and parenting decision-making of those women and the  
8  
9 unique opportunity for health professionals to strengthen quality of cardiac care. It details  
10  
11 women's struggle to gain autonomy and control over their decision-making and how this  
12  
13 may present challenges to self-care during pregnancy and impact on activities of daily living.  
14  
15 The level of autonomy and control was the most prevalent theme across the cardiac  
16  
17 conditions included; reflecting the need for women centred care.  
18  
19  
20  
21  
22

23  
24 Our findings are consistent with the experiences of women with other non-communicable  
25  
26 diseases in pregnancy, such as chronic kidney disease and diabetes [29 30] and similar to  
27  
28 studies of non-pregnant women with cardiac disease, providing further evidence of the  
29  
30 importance of women-centered care [31 32]. The American Heart Association emphasizes  
31  
32 the importance of measuring the self-reported health status (i.e. symptom burden,  
33  
34 functional status, and health-related quality of life) of patients with cardiac disease as it is  
35  
36 not only a necessary component of clinical risk scoring, but consistent with a holistic view of  
37  
38 health and the goals of patient centred care [33].  
39  
40  
41  
42  
43

44 This review identified opportunities to improve shared decision-making; a central  
45  
46 component of women centred care that requires clinicians to understand the women's  
47  
48 social context (her family, employment and other responsibilities) and her goals, values, and  
49  
50 preferences for health. Shared decision-making can facilitate effective communication  
51  
52 between a woman and her clinician to develop a shared understanding of the problem and  
53  
54 generate a mutually acceptable evaluation and management plan. In five of the studies in  
55  
56  
57  
58  
59  
60

1  
2  
3 our meta-synthesis, women identified as barriers to satisfactory care a lack of clinician  
4  
5 understanding of and attention to women's existing knowledge, as well as women's self-  
6  
7 reported health status and health needs [21-23 26 27]. While suggestions have been made  
8  
9 about how shared decision making can be implemented into cardiovascular care [34 35] and  
10  
11 translated into practice in national programs such as the Million Hearts® initiative [36 37], a  
12  
13 gendered approach has not been noted, nor examined in the unique context of various  
14  
15 cardiac conditions in pregnancy.  
16  
17

18  
19  
20  
21 Clinicians could be better supported to facilitate a woman's active role in decision making at  
22  
23 the point of care by using tailored tools, particularly where a woman's self-care may be  
24  
25 affected by downplaying their cardiac disease as found in two studies in the meta-synthesis  
26  
27 [24 25]. Other studies have found non-pregnant women to minimize their conditions [31]  
28  
29 and hence gendered tools that incorporate collaborative deliberation [38] or conversations  
30  
31 between women and clinicians, maybe useful more broadly in the care of women with  
32  
33 cardiovascular disease. The Elwyn et al. "Talk model" [39] may provide a useful conceptual  
34  
35 framework for shared decision-making that enables measurement across four components  
36  
37 to facilitate effective communication and its on-going evaluation between a woman and her  
38  
39 clinician. However, women also have a responsibility to contribute to a charting a clear path  
40  
41 through decision-making by identifying barriers to their implementation and solutions to  
42  
43 these [40]. Even though this framework provides a practical way forward for clinicians and  
44  
45 women, it does not consider the steps or processes required for implementation including  
46  
47 buy-in at the individual clinician and practice level, integration into the workflow and  
48  
49 evaluation, [34] particularly in the context of cardiac disease in pregnancy. Consideration  
50  
51 also needs to be given to how shared decision making and relevant tools can be  
52  
53  
54  
55  
56  
57  
58  
59  
60

1  
2  
3 incorporated into existing guidelines or consensus statements for the management of  
4  
5 women with cardiac disease in pregnancy to guide health professional practice [12].  
6  
7

8  
9  
10 The evidence shows that such tools can increase patient participation and improve accurate  
11  
12 risk perceptions when examples of such risk-based situations are included in decision aids  
13  
14 [41 42]. Women should be engaged in the co-design of materials to ensure beneficial effects  
15  
16 on health behaviour and health status [43]. Shared decision-making must however, also  
17  
18 consider communication across the clinical team that may include cardiologists,  
19  
20 obstetricians, maternal-fetal medicine specialists, obstetric physicians and anaesthetists,  
21  
22 intensivists, midwives and cardiac nurses. Patel et al reported that women who received  
23  
24 high-quality care from teams of health professionals noted that effective communication  
25  
26 had led to responsive and tailored care [23]. However, a coordinated team approach to  
27  
28 caring for women with cardiac disease in pregnancy can be challenging due to the distinct  
29  
30 specialist areas involved and the limited clinical evidence concerning effective approaches  
31  
32 to managing such complex care. These challenges may lead to fragmented care and  
33  
34 variation in the quality of care.  
35  
36  
37  
38  
39  
40  
41

42 The voices of women in the papers revealed high levels of distress and emotional tension  
43  
44 when a diagnosis of a life-threatening condition was received when they were pregnant or  
45  
46 contemplating pregnancy. Women also expressed fear of death and disability, and they felt  
47  
48 helpless and dependent upon others. These findings concur with the reflections of nurses  
49  
50 who cared for women with cardiac disease in pregnancy who also reported that decision-  
51  
52 making for many women was “emotionally charged”. Nurses stated that women in a US  
53  
54 study were concerned about securing stable employment, having sufficient financial  
55  
56  
57  
58  
59  
60

1  
2  
3 resources to investigate international adoption, providing a good home for the baby, being  
4  
5 good parents, and balancing work responsibilities with the care of children [44]. The meta-  
6  
7 synthesis findings are also in line with the experience of women with other serious diseases  
8  
9 in pregnancy [29 45] and highlights the need to not only console women and allay their  
10  
11 fears, but to support them to build confidence and resilience through coping and self-care  
12  
13 strategies.  
14  
15

16  
17  
18  
19 Our review provides little insight into pre-conception counselling and the advice clinicians  
20  
21 provided concerning contraception for women with existing cardiac disease or after a  
22  
23 pregnancy where cardiac disease was diagnosed. Gaps in women's knowledge have been  
24  
25 noted in other studies [46 47] with Vigil et al. demonstrating in one study that less than 50%  
26  
27 of women with cardiac disease had received any counselling [48]. Miner emphasized the  
28  
29 importance of including contraceptive counselling early in adolescence on an "on-going  
30  
31 basis"[49]. The American Heart Association and others provide recommendations regarding  
32  
33 prenatal counselling for women and their families with heart disease, as well counselling in  
34  
35 relation to the expectant child that takes into consideration feeding and growth issues,  
36  
37 quality of life and long-term care, family stressors, and fetal cardiac interventions [12 50].  
38  
39  
40  
41  
42  
43

44 Empathetic health professional counselling is a central component of health care that  
45  
46 requires professionals to relay clinical risks and realities while also taking the emotional  
47  
48 vulnerabilities, values and beliefs of women into consideration across the reproductive life  
49  
50 span [44]. Little is known about how health professionals can support women with cardiac  
51  
52 disease in pregnancy to build resilience and self-efficacy.  
53  
54  
55  
56  
57  
58  
59  
60

1  
2  
3 In our review, the timing of a woman's diagnosis of cardiac disease and hence her  
4  
5 experience was different depending on the type of condition. Most of those with congenital  
6  
7 heart disease would have been expected to have knowledge of their conditions, and ideally  
8  
9 would have had pre-conception counselling. However, for those with peripartum  
10  
11 cardiomyopathy, the diagnosis may have occurred late in pregnancy, meaning that some  
12  
13 women would have entered pregnancy without cardiac disease and experienced a very  
14  
15 different pregnancy until diagnosed and hence having different counselling needs. However,  
16  
17 many women with peripartum cardiomyopathy present post-partum [51] and therefore  
18  
19 these women's counselling needs would reflect the consideration of subsequent  
20  
21 pregnancies.  
22  
23  
24  
25  
26  
27

28  
29 Counselling may be enhanced by positive relationships between women and their health  
30  
31 professionals. In our review women said they trusted their clinicians and noted the caring  
32  
33 response of nurses and midwives, especially in enabling women to spend time with their  
34  
35 babies in hospital [22]. Women with serious medical issues in pregnancy have described the  
36  
37 importance of having a relationship with a known health provider [30 52] who could identify  
38  
39 their specific needs and positive opportunities for health and well-being rather than "all  
40  
41 doom and gloom" that were noted to be empowering [30]. Social workers can also play an  
42  
43 important counselling role in these contexts.  
44  
45  
46  
47

48  
49 The health benefits of social support for pregnant women from their partner, family, friends  
50  
51 and those who have experienced similar circumstances are well known [53] and a significant  
52  
53 predictor of health-related quality of life. Other authors have highlighted the importance of  
54  
55 peer mentoring for pregnant women with defined health needs to allay fear and anxiety  
56  
57  
58  
59

1  
2  
3 including for women with spinal cord injuries [52 54]. Strong on-line health care social  
4  
5 networks have also been found to be important in the provision of emotional support for  
6  
7 patients with cardiovascular disease [55]. Women in two papers in this review [26 27] found  
8  
9 on-line blogs to be a helpful way to enable contact with those beyond their immediate  
10  
11 networks. Other studies found on-line forums to be supportive for other pregnant women  
12  
13 with rare or life-threatening conditions in pregnancy [56].  
14  
15

16  
17  
18 Our review points to the need for gender specific models in cardiac disease that can inform  
19  
20 the development of decision-making tools and with the input of women, can better harness  
21  
22 opportunities to facilitate the development of women's resilience, self-care and social  
23  
24 support.  
25  
26  
27

28  
29  
30 Of the 11 studies included in this meta-synthesis (see Table 3) there were a total of 383  
31  
32 women participants with the following conditions: congenital heart disease (n = 81);  
33  
34 peripartum cardiomyopathy (PPCM) (n = 298), and Long QT syndrome (n = 4). The voices of  
35  
36 pregnant women with genetic conditions appeared to be absent from the literature, as well  
37  
38 as those from other than high-income countries. Thus, there is limited generalizability  
39  
40 across all cardiac disease in pregnancy, yet it is likely most women struggle to gain  
41  
42 autonomy and control over their decision-making and to manage their fears and  
43  
44 vulnerabilities for all cardiac conditions.  
45  
46  
47

48  
49  
50 This method did not allow pooling of results and comparison of data across studies  
51  
52  
53 However, the analysis included an examination of how studies are related, or dissonant, by  
54  
55 comparing coding and themes as shown in Table 4. This enabled patterns to be discerned  
56  
57  
58



1  
2  
3 that may be translated to cardiac disease in pregnancy and potentially other rare and  
4  
5 chronic diseases in pregnancy. A thematic analysis may have also led to a loss of detail  
6  
7 particularly the unique contexts of women lives; however, efforts were made to maintain  
8  
9 this in the descriptive part of the analysis to retain the integrity of the original studies. The  
10  
11 exclusion of non-English papers may have resulted in an incomplete retrieval of research  
12  
13 studies. Our multi-disciplinary research team comprised of a social scientist, medical  
14  
15 ethicist, a cardiologist, obstetricians and a medical perinatal epidemiologist enabled a rich  
16  
17 and detailed yet complex account of the extracted data.  
18  
19  
20  
21  
22

### 23 *Conclusion*

24  
25 Research into the experiences of women with cardiac disease in pregnancy is essential for  
26  
27 the development of evidence-based women-centred care to enable clinicians to better  
28  
29 respond to patient needs, values and preferences. This meta-synthesis revealed that there is  
30  
31 a need for tailored, responsive care and gendered models to guide shared decision-making  
32  
33 and empathetic counselling across the reproductive lifespan for women with cardiac  
34  
35 disease.  
36  
37  
38  
39  
40  
41  
42  
43  
44  
45  
46  
47  
48  
49  
50  
51  
52  
53  
54  
55  
56  
57  
58  
59  
60

## REFERENCES

1. Creanga AA, Syverson C, Seed K, et al. Pregnancy-Related Mortality in the United States, 2011–2013. *Obstetrics and Gynecology* 2017;**130**(2):366-73 doi: doi: 10.1097/AOG.0000000000002114[published Online First: Epub Date]].
2. Centre for Maternal and Child Enquiries. Saving Mothers' Lives: reviewing maternal deaths to make motherhood safer-2006-2008. The Eighth Report on Confidential Enquiries into Maternal Deaths in the United Kingdom. *BJOG* 2011;**118**(Suppl. 1):1-203 doi: doi: 10.1111/j.1471-0528.2010.02847.x[published Online First: Epub Date]].
3. Humphrey MD, Bonello M, Chughtai A, et al. *Maternal deaths in Australia 2008-2012*. Canberra: Australian Institute of Health and Welfare, 2015.
4. Sullivan EA, King JF. *Maternal deaths in Australia 2000-2002. Maternal Deaths* Sydney: Australian Institute of Health and Welfare, National Perinatal Statistics Unit 2006.
5. Cliffe S, Black D, Bryant J, et al. Maternal deaths in New South Wales, Australia: a data linkage project. *Australian and New Zealand Journal of Obstetrics and Gynaecology* 2008;**48**(3):255-60 doi: doi: 10.1111/j.1479-828X.2008.00878.x[published Online First: Epub Date]].
6. Roos-Hesselink JW, Ruys TP, Stein JJ, et al. Outcome of pregnancy in patients with structural or ischaemic heart disease: results of a registry of the European Society of Cardiology. *European Heart Journal* 2013;**34**(9):657-65 doi: doi: 10.1093/eurheartj/ehs270[published Online First: Epub Date]].
7. RCOG. Cardiac Disease and Pregnancy. Good Practice. London: Royal College of Obstetricians and Gynaecologists, 2011.
8. Roberts WT, Adamson D. Cardiovascular disease in pregnancy. *Obstetrics, Gynaecology and Reproductive Medicine* 2013;**23**(7):195-201 doi: doi: 10.1016/j.ogrm.2013.06.003[published Online First: Epub Date]].
9. Moons P, Bovijn L, Budts W, et al. Temporal Trends in Survival to Adulthood Among Patients Born With Congenital Heart Disease From 1970 to 1992 in Belgium: A Clinical Perspective. *Circulation* 2010;**122**(22):2264-72 doi: doi: 10.1161/CIRCULATIONAHA.110.946343 [published Online First: Epub Date]].
10. Chor J, Rankin K, Harwood B, et al. Unintended pregnancy and postpartum contraceptive use in women with and without chronic medical disease who experienced a live birth. *Contraception* 2011;**84**(1):57-63
11. Lindley KJ, Madden T, Cahill AG, et al. Contraceptive use and unintended pregnancy in women with congenital heart disease. *Obstetrics & Gynecology* 2015;**126**(2):363-69
12. Canobbio MM, Warnes CA, Aboulhosn J, et al. Management of pregnancy in patients with complex congenital heart disease: a scientific statement for healthcare professionals from the American Heart Association *Circulation* 2017;**135**(8):e50-e87 DOI: 10.1161/CIR.0000000000000458 doi: doi: 10.1161/CIR.0000000000000458 [published Online First: Epub Date]].
13. RCOG. Cardiac Disease and Pregnancy Good Practice No. 13 <https://www.rcog.org.uk/globalassets/documents/guidelines/goodpractice13cardiacdiseaseandpregnancy.pdf>. London: Royal College of Obstetricians and Gynaecologists, 2011.
14. Regitz-Zagrosek V, Blomstrom Lundqvist C, Borghi C, et al. ESC Guidelines on the management of cardiovascular diseases during pregnancy. *European Heart Journal* 2011;**32**:3147-97 doi:10.1093/eurheartj/ehr218
15. Thomas J, Harden A. Methods for the thematic synthesis of qualitative research in systematic reviews. *BMC Medical Research Methodology* 2008;**8**(1):45 doi: doi: 10.1186/1471-2288-8-45[published Online First: Epub Date]].
16. NHS. Critical Appraisal Skills Programme (CASP) making sense of evidence 10 questions to help you make sense of qualitative research. Secondary Critical Appraisal Skills Programme (CASP)

- making sense of evidence 10 questions to help you make sense of qualitative research 2006.  
<http://www.casp-uk.net/casp-tools-checklists>.
17. Thomas DR. A general inductive approach for analyzing qualitative evaluation data. *American Journal of Evaluation* 2006;**27**(2):237-46 doi: doi: 10.1177/1098214005283748[published Online First: Epub Date]].
  18. Andersen J, Øyen N, Bjorvatn C, et al. Living with long QT syndrome: A qualitative study of coping with increased risk of sudden cardiac death. *Journal of Genetic Counseling* 2008;**17**(5):489-98 doi: doi: 10.1007/s10897-008-9167-y[published Online First: Epub Date]].
  19. Claessens P, Moons P, de Casterlé BD, et al. What Does it Mean to Live with a Congenital Heart Disease? A Qualitative Study on the Lived Experiences of Adult Patients. *European Journal of Cardiovascular Nursing* 2005;**4**(1):3-10 doi: doi: 10.1016/j.ejcnurse.2004.12.003[published Online First: Epub Date]].
  20. Gantt L. As normal a life as possible: mothers and their daughters with congenital heart disease. *Health Care for Women International* 2002;**23**(5):481-91 doi: doi: 10.1080/073993302760190083[published Online First: Epub Date]].
  21. Gantt LT. Growing up heartsick: the experiences of young women with congenital heart disease. *Health Care for Women International* 1992;**13**(3):241-48 doi: doi: 10.1080/07399339209515999[published Online First: Epub Date]].
  22. Dekker RL, Morton CH, Singleton P, et al. Women's Experiences Being Diagnosed With Peripartum Cardiomyopathy: A Qualitative Study. *Journal of Midwifery and Women's Health* 2016;**61**(4):467-73 doi: doi: 10.1111/jmwh.12448[published Online First: Epub Date]].
  23. Patel H, Schaufelberger M, Begleya C, et al. Experiences of health care in women with Peripartum Cardiomyopathy in Sweden: a qualitative interview study. *BMC Pregnancy and Childbirth* 2016;**16**(383) doi: doi: 10.1186/s12884-016-1178-3[published Online First: Epub Date]].
  24. Ngu K, Hay M, Menahem S. Case Studies of the Perceptions of Women with High Risk Congenital Heart Disease Successfully Completing a Pregnancy. *Heart, Lung and Circulation* 2014;**23**(9):811-17 doi: doi: 10.1016/j.hlc.2014.03.019[published Online First: Epub Date]].
  25. Ngu K, Hay M, Menahem S. Perceptions and motivations of an Australian cohort of women with or without congenital heart disease proceeding to pregnancy. *International Journal of Gynecology and Obstetrics* 2014;**126**(3):252-55 doi: doi: 10.1016/j.ijgo.2014.03.032[published Online First: Epub Date]].
  26. Hess RF, Weinland JA, Beebe K. "I Am Not Alone": A Survey of Women With Peripartum Cardiomyopathy and Their Participation in an Online Support Group. *CIN: Computers, Informatics, Nursing* 2010;**28**(4):215-21 doi: doi: 10.1097/NCN.0b013e3181e1e28f[published Online First: Epub Date]].
  27. Hess RF, Weinland JAD. The life-changing impact of peripartum cardiomyopathy: an analysis of online postings. *MCN: The American Journal of Maternal Child Nursing* 2012;**37**(4):241-46 doi: doi: 10.1097/NMC.0b013e31824b52ed[published Online First: Epub Date]].
  28. Patel H, Berg M, Barasa A, et al. Symptoms in women with Peripartum Cardiomyopathy: A mixed method study. *Midwifery* 2016;**32**:14-20 doi: doi: 10.1016/j.midw.2015.10.001[published Online First: Epub Date]].
  29. Tong A, Jesudason S, Craig JC, et al. Perspectives on pregnancy in women with chronic kidney disease: systematic review of qualitative studies. *Nephrology Dialysis Transplantation* 2015;**30**(4):652-61 doi: doi: 10.1093/ndt/gfu378[published Online First: Epub Date]].
  30. McCorry NK, Hughes C, Spence D, et al. Pregnancy planning and diabetes: a qualitative exploration of women's attitudes toward preconception care. *Journal of Midwifery and Women's Health* 2012;**57**(4):396-402 doi: doi: 10.1111/j.1542-2011.2011.00143.x[published Online First: Epub Date]].

- 1  
2  
3 31. Emslie C. Women, men and coronary heart disease: a review of the qualitative literature. *Journal*  
4 *of Advanced Nursing* 2005;**51**(4):382-95 doi: doi: 10.1111/j.1365-  
5 2648.2005.03509.x[published Online First: Epub Date]].
- 6 32. Lockyer L. Women's interpretation of their coronary heart disease symptoms. *European Journal*  
7 *of Cardiovascular Nursing* 2005;**4**(1):29-35 doi: doi:  
8 10.1016/j.ejcnurse.2004.09.003[published Online First: Epub Date]].
- 9 33. Rumsfeld JS, Alexander KP, Goff DC, et al. Cardiovascular health: the importance of measuring  
10 patient-reported health status. *Circulation* 2013;**127**(22):2233-49 doi: doi:  
11 10.1161/CIR.0b013e3182949a2e [published Online First: Epub Date]].
- 12 34. Hess EP, Coylewright M, Frosch DL, et al. Implementation of Shared Decision Making in  
13 Cardiovascular Care. *Circulation: Cardiovascular Quality and Outcomes* 2014;**7**(5):797-803  
14 doi: doi: 10.1161/CIRCOUTCOMES.113.000351 [published Online First: Epub Date]].
- 15 35. Ting HH, Brito JP, Montori VM. Shared Decision Making. *Circulation: Cardiovascular Quality and*  
16 *Outcomes* 2014;**7**(2):323-27 doi: doi: 10.1161/circoutcomes.113.000288[published Online  
17 First: Epub Date]].
- 18 36. Lloyd-Jones DM, Huffman MD, Karmali KN, et al. Estimating longitudinal risks and benefits from  
19 cardiovascular preventive therapies among medicare patients: The Million Hearts  
20 longitudinal ASCVD risk assessment tool. *Circulation* 2016;**135**(13):e793–e813 doi: DOI:  
21 10.1161/CIR.0000000000000467[published Online First: Epub Date]].
- 22 37. CMS. Million Hearts®: Cardiovascular Disease Risk Reduction Model. Secondary Million Hearts®:  
23 Cardiovascular Disease Risk Reduction Model 2017.  
24 <https://innovation.cms.gov/initiatives/Million-Hearts-CVDRRM/>.
- 25 38. Elwyn G, Frosch D, Volandes AE, et al. Investing in deliberation: a definition and classification of  
26 decision support interventions for people facing difficult health decisions. *Medical Decision*  
27 *Making* 2010;**30**(6):701-11 doi: doi: 10.1177/0272989X10386231[published Online First:  
28 Epub Date]].
- 29 39. Elwyn G, Tsulukidze M, Edwards A, et al. Using a 'talk' model of shared decision making to  
30 propose an observation-based measure: Observer OPTION 5 Item. *Patient Education and*  
31 *Counseling* 2013;**93**(2):265-71 doi: doi: 10.1016/j.pec.2013.08.005[published Online First:  
32 Epub Date]].
- 33 40. AHA. Overcoming Barriers to Shared Decision Making. Secondary Overcoming Barriers to Shared  
34 Decision Making 2017.  
35 [http://www.heart.org/HEARTORG/Conditions/HeartFailure/Overcoming-Barriers-to-Shared-](http://www.heart.org/HEARTORG/Conditions/HeartFailure/Overcoming-Barriers-to-Shared-Decision-Making_UCM_441939_Article.jsp#.WacypdFLdnI)  
36 [Decision-Making\\_UCM\\_441939\\_Article.jsp#.WacypdFLdnI](http://www.heart.org/HEARTORG/Conditions/HeartFailure/Overcoming-Barriers-to-Shared-Decision-Making_UCM_441939_Article.jsp#.WacypdFLdnI).
- 37 41. Stacey D, Bennett CL, Barry MJ, et al. Decision aids for people facing health treatment or  
38 screening decisions. *Cochrane Database Syst Rev* 2011;**10**(10) doi: doi:  
39 10.1002/14651858.CD001431.pub2.[published Online First: Epub Date]].
- 40 42. Coylewright M, Branda M, Inselman JW, et al. Impact of sociodemographic patient characteristics  
41 on the efficacy of decision aids. *Circulation: Cardiovascular Quality and Outcomes*  
42 2014;**7**(3):360-67 doi: doi: 10.1161/HCQ.0000000000000006 [published Online First: Epub  
43 Date]].
- 44 43. Hjelmfors A, Stromberg A, Friedrichsen M, et al. Using co-design to develop communication  
45 interventions in heart failure care. *European Journal of Cardiovascular Nursing* 2016;**15**:S19-  
46 S20
- 47 44. Kilpatrick K, Purden M. Using reflective nursing practice to improve care of women with  
48 congenital heart disease: considering pregnancy. *MCN: The American Journal of Maternal*  
49 *Child Nursing* 2007;**32**(3):140-47 doi: doi: 10.1097/01.NMC.0000269561.97239.d8[published  
50 Online First: Epub Date]].
- 51 45. Sanders LB. Women's voices: The lived experience of pregnancy and motherhood after diagnosis  
52 with HIV. *Journal of the Association of Nurses in AIDS Care* 2008;**19**(1):47-57 doi: doi:  
53 10.1016/j.jana.2007.10.002[published Online First: Epub Date]].
- 54  
55  
56  
57  
58  
59

- 1  
2  
3 46. Kovacs AH, Harrison JL, Colman JM, et al. Pregnancy and contraception in congenital heart  
4 disease: what women are not told. *Journal of the American College of Cardiology*  
5 2008;**52**(7):577-78 doi: doi: 10.1016/j.jacc.2008.05.013 [published Online First: Epub Date]].  
6  
7 47. Chor J, Oswald L, Briller J, et al. Reproductive health experiences of women with cardiovascular  
8 disease. *Contraception* 2012;**86**(5):464-69 doi:  
9 10.1016/j.contraception.2012.02.013[published Online First: Epub Date]].  
10  
11 48. Vigi M, Kaemmerer M, Seifert-Klauss V, et al. Contraception in women with congenital heart  
12 disease. *The American Journal of Cardiology* 2010;**106**(9):1317-21 doi: doi:  
13 10.1016/j.amjcard.2010.06.060[published Online First: Epub Date]].  
14  
15 49. Miner PD. Contraceptive choices for females with congenital heart disease. *Progress in Pediatric*  
16 *cardiology* 2004;**19**(1):15-24 doi: doi: 10.1016/j.ppedcard.2003.01.021[published Online  
17 First: Epub Date]].  
18  
19 50. Lafranchi T, Lincoln P. Prenatal Counseling and Care for Single-Ventricle Heart Disease: One  
20 Center's Model for Care. *Critical Care Nurse* 2015;**35**(5):53-61 doi: doi: 10.4037/ccn2015247  
21 [published Online First: Epub Date]].  
22  
23 51. Elkayam U. Clinical Characteristics of Peripartum Cardiomyopathy in the United States: Diagnosis,  
24 Prognosis, and Management. *Journal of the American College of Cardiology* 2011;**58**(7):659-  
25 70 doi: https://doi.org/10.1016/j.jacc.2011.03.047[published Online First: Epub Date]].  
26  
27 52. Bertschy S, Geyh S, Pannek J, et al. Perceived needs and experiences with healthcare services of  
28 women with spinal cord injury during pregnancy and childbirth—a qualitative content  
29 analysis of focus groups and individual interviews. *BMC Health Services Research*  
30 2015;**15**(1):234 doi: doi: 10.1186/s12913-015-0878-0[published Online First: Epub Date]].  
31  
32 53. Emmanuel E, St John W, Sun J. Relationship between social support and quality of life in  
33 childbearing women during the perinatal period. *Journal of Obstetric, Gynecologic, and*  
34 *Neonatal Nursing* 2012;**41**(6):E62-E70 doi: doi: 10.1111/j.1552-6909.2012.01400[published  
35 Online First: Epub Date]].  
36  
37 54. Tebbet M, Kennedy P. The experience of childbirth for women with spinal cord injuries: An  
38 interpretative phenomenology analysis study. *Disability and Rehabilitation* 2012;**34**(9):762-  
39 69 doi: doi: 10.3109/09638288.2011.619619[published Online First: Epub Date]].  
40  
41 55. Medina E, Mesquita C. Healthcare social networks for patients with cardiovascular diseases and  
42 recommendation systems. *International Journal of Cardiovascular Sciences* 2016;**29**(1):80-85  
43 doi: doi: 10.5935/2359-4802.20160005[published Online First: Epub Date]].  
44  
45 56. Lowe P, Powell J, Griffiths F, et al. "Making it all normal": the role of the internet in problematic  
46 pregnancy. *Qualitative Health Research* 2009;**19**(10):1476-84 doi: doi:  
47 10.1177/1049732309348368[published Online First: Epub Date]].  
48  
49  
50  
51  
52  
53  
54  
55  
56  
57  
58  
59  
60

**Acknowledgments**

The authors would like to thank Sabina Belli for editing this paper.

**Sources of Funding**

This study was unfunded.

**Conflict of interest**

None

**Author contributions**

The study was conceived by EAS and EAS and AJD designed the study. YK and undertook the literature search and screening with assistance from AJD. YK, AJD and EAS critically appraised the papers. YK and AJD undertook the initial analysis with input from all authors (EAS, KL, MJP and WP). AJD wrote the manuscript, all authors edited and approved the final manuscript.

**Data sharing statement**

No additional data are available.

1  
2  
3  
4  
5  
6  
7  
8  
9  
10  
11  
12  
13  
14  
15  
16  
17  
18  
19  
20  
21  
22  
23  
24  
25  
26  
27  
28  
29  
30  
31  
32  
33  
34  
35  
36  
37  
38  
39  
40  
41  
42  
43  
44  
45  
46  
47  
48  
49  
50  
51  
52  
53  
54  
55  
56  
57  
58  
59  
60

For peer review only

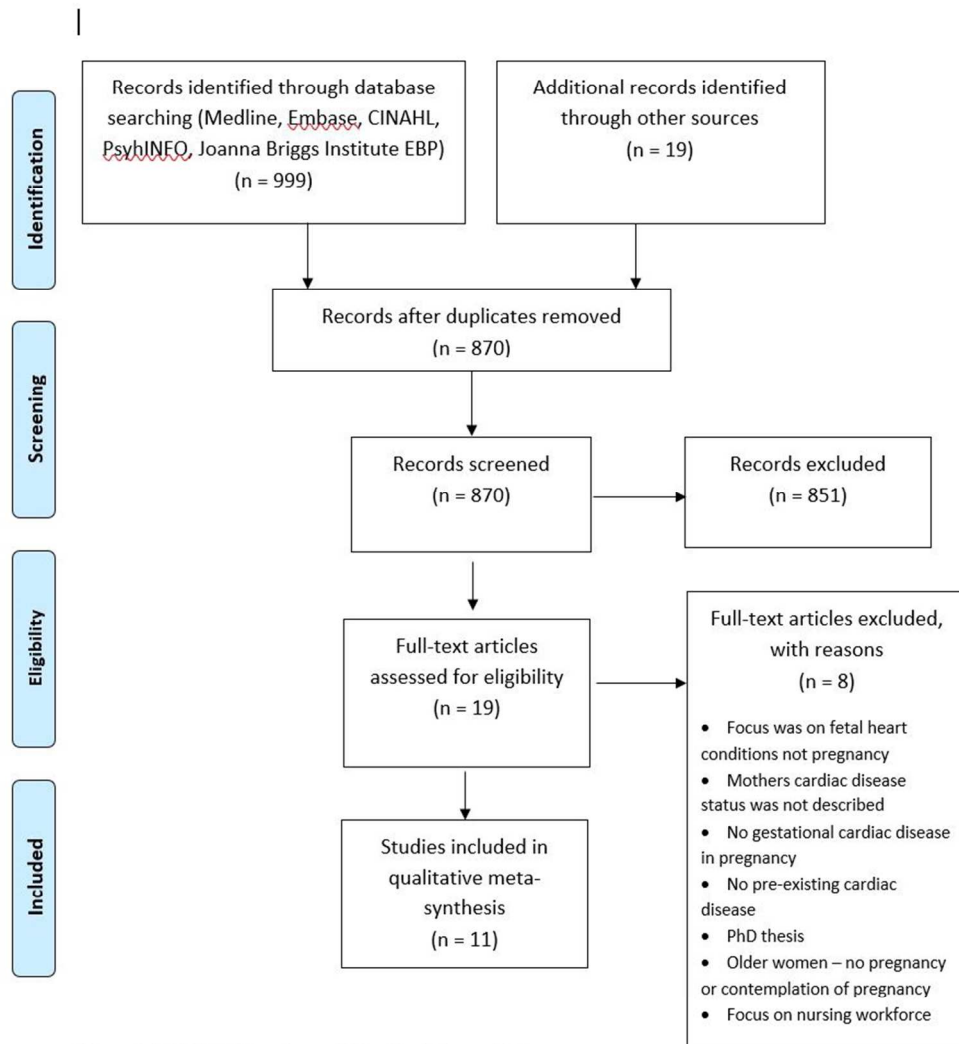

Figure1. PRISMA Flowchart of Cardiac Disease in Pregnancy

96x107mm (240 x 240 DPI)



## Supplementary data-

## Appendix 1: Full search strategy

| Bibliographic Database                             | Search strategy                                                                                                                                                                                                                                                                                                                                                                                                                                                                                                                                                                                                                                                                                                                                                                                                                                                                                                                                                                                                                                                                                                                                                                                                                                                                                                                                                                                                                                                                                                                                                                                                                                                                                                                                                                                                                                                                                                                                                                                                                                                                                                                                                                           |
|----------------------------------------------------|-------------------------------------------------------------------------------------------------------------------------------------------------------------------------------------------------------------------------------------------------------------------------------------------------------------------------------------------------------------------------------------------------------------------------------------------------------------------------------------------------------------------------------------------------------------------------------------------------------------------------------------------------------------------------------------------------------------------------------------------------------------------------------------------------------------------------------------------------------------------------------------------------------------------------------------------------------------------------------------------------------------------------------------------------------------------------------------------------------------------------------------------------------------------------------------------------------------------------------------------------------------------------------------------------------------------------------------------------------------------------------------------------------------------------------------------------------------------------------------------------------------------------------------------------------------------------------------------------------------------------------------------------------------------------------------------------------------------------------------------------------------------------------------------------------------------------------------------------------------------------------------------------------------------------------------------------------------------------------------------------------------------------------------------------------------------------------------------------------------------------------------------------------------------------------------------|
| <b>MEDLINE</b><br><br><b>1996 – 6 October 2016</b> | <ol style="list-style-type: none"> <li>1 Cardiac disease.mp. or Heart Diseases</li> <li>2 Postoperative Complications/ or Heart Transplantation/ or heart transplant.mp. or Heart Failure</li> <li>3 Rheumatic heart disease.mp. or Rheumatic Heart Disease</li> <li>4 Adult/ or Hypertension, Pulmonary/ or Heart Defects, Congenital/ or congenital heart disease.mp. or Cardiac Surgical Procedures/</li> <li>5 Hypertension/ or Cardiomyopathies/ or Cardiovascular Diseases/ or Arrhythmias, Cardiac/ or Heart Defects, Congenital/ or Heart Diseases/ or Cardiomyopathy, Hypertrophic/ or genetic cardiac disease.mp.</li> <li>6 Arrhythmias, Cardiac/ or Myocardial Infarction/ or Atrial Fibrillation/ or chronic arrhythmia.mp. or Tachycardia, Supraventricular/ or Coronary Disease/</li> <li>7 1 or 2 or 3 or 4 or 5 or 6</li> <li>8 Pregnancy Complications, Hematologic/ or Pregnancy, Unplanned/ or Pregnancy Maintenance/ or Pregnancy, High-Risk/ or Pregnancy, Unwanted/ or Pregnancy in Adolescence/ or Pregnancy, Multiple/ or Pregnancy Outcome/ or Pregnancy Complications/ or Pregnancy/ or Hypertension, Pregnancy-Induced/ or pregnancy.mp. or Pregnancy in Diabetics/ or Pregnancy, Abdominal/ or Pregnancy Complications, Cardiovascular/</li> <li>9 Pregnant women.mp. or Pregnant Women/</li> <li>10 Infant Mortality/ or Pregnancy/ or Maternal Health Services/ or Prenatal Care/ or Pregnancy Complications/ or antenatal care.mp. or Socioeconomic Factors/</li> <li>11 Perinatal care.mp. or Perinatal Care/</li> <li>12 birth.mp. or Parturition/</li> <li>13 postpartum.mp. or Postpartum Period</li> <li>14 8 or 9 or 10 or 11 or 12 or 13</li> <li>15 Decision making.mp. or Decision Making/</li> <li>16 Shared decision making.mp.</li> <li>17 "Delivery of Health Care"/ or Decision Making/ or Physician-Patient Relations/ or Patient-Centered Care/ or patient centered care.mp.</li> <li>18 15 or 16 or 17</li> <li>19 midwives.mp. or Midwifery/</li> <li>20 General practitioner.mp. or General Practitioners/</li> <li>21 Primary physician.mp.</li> <li>22 Obstetrics/ or obstetrician.mp. or Practice Patterns, Physicians'/</li> </ol> |

|                                                                      |                                                                                                                                                                                                                                                                                                                                                                                                                                                                                                                                                                                                                                                                                                                                                                                                                                                                                                                                                                                                                                                                                                                                                                                                                                                                                                                                                                                                                                                                                                                                                                                                                                                                                                                                                                                                                   |
|----------------------------------------------------------------------|-------------------------------------------------------------------------------------------------------------------------------------------------------------------------------------------------------------------------------------------------------------------------------------------------------------------------------------------------------------------------------------------------------------------------------------------------------------------------------------------------------------------------------------------------------------------------------------------------------------------------------------------------------------------------------------------------------------------------------------------------------------------------------------------------------------------------------------------------------------------------------------------------------------------------------------------------------------------------------------------------------------------------------------------------------------------------------------------------------------------------------------------------------------------------------------------------------------------------------------------------------------------------------------------------------------------------------------------------------------------------------------------------------------------------------------------------------------------------------------------------------------------------------------------------------------------------------------------------------------------------------------------------------------------------------------------------------------------------------------------------------------------------------------------------------------------|
|                                                                      | <p>23 cardiologist.mp.<br/>                 24 Family Practice/ or Allied Health Personnel/ or allied health professional.mp.<br/>                 25 19 or 20 or 21 or 22 or 23 or 24<br/>                 26 7 and 14 and 18 and 25</p>                                                                                                                                                                                                                                                                                                                                                                                                                                                                                                                                                                                                                                                                                                                                                                                                                                                                                                                                                                                                                                                                                                                                                                                                                                                                                                                                                                                                                                                                                                                                                                         |
| <p><b>EMBASE:</b><br/><br/> <b>1996 - 6 October 2016</b></p>         | <p>1 cardiac disease.mp.<br/>                 2 rheumatic heart disease.mp. or rheumatic heart disease/<br/>                 3 congenital heart disease.mp. orexp congenital heart disease/<br/>                 4 Arrhythmias.mp. or heart arrhythmia/<br/>                 5 1 and 2 and 3 and 4<br/>                 6 pregnant women.mp. or pregnant woman/<br/>                 7 pregnancy Complications.mp. or pregnancy complication/<br/>                 8 infant Mortality.mp. or infant mortality/<br/>                 9 perinatal care.mp. or perinatal care/<br/>                 10 birth/<br/>                 11 postpartum pain/ or postpartum hemorrhage/ or postpartum.mp.<br/>                 12 6 and 7 and 8 and 9 and 10 and 11<br/>                 13 decision making.mp. or decision making/<br/>                 14 medical decision making/ or doctor patient relation/ or decision making/ or patient participation/ or informed consent/ or shared decision making.mp. or interpersonal communication/<br/>                 15 13 and 14<br/>                 16 midwives.mp. or midwife/<br/>                 17 general practitioner.mp. or general practitioner/<br/>                 18 general practitioner/ or primary health care/ or general practice/ or primary physician.mp.<br/>                 19 obstetrics/ or obstetrician/ or pregnancy/ or pregnancy complication/<br/>                 20 cardiologist/ or heart disease/<br/>                 21 family Practice.mp. or general practice/<br/>                 22 16 and 17 and 18 and 19 and 20<br/>                 23 21 and 22<br/>                 24 5 and 12 and 15 and 23<br/>                 25 limit 24 to ("qualitative (maximizes sensitivity)" and English and article and last 20 years)</p> |
| <p><b>CINAHL (EBSCO)</b><br/><br/> <b>1995 - 11 October 2016</b></p> | <p>S1" cardiac disease "<br/>                 S2 (MH "pregnancy") OR "pregnancy"<br/>                 S3 MH "decision making, patient") OR (MH "patient centered care") OR ""wom?n cent* care" OR "patient cent* care" OR "wom?n* experience" OR "shared decision making""<br/>                 S4 S1 AND S2 AND S3</p>                                                                                                                                                                                                                                                                                                                                                                                                                                                                                                                                                                                                                                                                                                                                                                                                                                                                                                                                                                                                                                                                                                                                                                                                                                                                                                                                                                                                                                                                                           |
| <p><b>PsycINFO (EBSCO)</b></p>                                       | <p>1. cardiac disease</p>                                                                                                                                                                                                                                                                                                                                                                                                                                                                                                                                                                                                                                                                                                                                                                                                                                                                                                                                                                                                                                                                                                                                                                                                                                                                                                                                                                                                                                                                                                                                                                                                                                                                                                                                                                                         |

1  
2  
3  
4  
5  
6  
7  
8  
9  
10  
11  
12  
13  
14  
15  
16  
17  
18  
19  
20  
21  
22  
23  
24  
25  
26  
27  
28  
29  
30  
31  
32  
33  
34  
35  
36  
37  
38  
39  
40  
41  
42  
43  
44  
45  
46  
47  
48  
49  
50  
51  
52  
53  
54  
55  
56  
57  
58  
59  
60

|                               |                                                                                                                                                                                                                                               |
|-------------------------------|-----------------------------------------------------------------------------------------------------------------------------------------------------------------------------------------------------------------------------------------------|
| <b>1984 - 18 October 2016</b> | <p>2. MH "Pregnancy") OR "pregnancy"</p> <p>3. (MH "Decision Making, Patient") OR (MH "Patient Centered Care") OR ""wom?n cent* care" OR "patient cent* care" OR "wom?n* experience" OR "shared decision making""</p> <p>4. 1 AND 2 AND 3</p> |
|-------------------------------|-----------------------------------------------------------------------------------------------------------------------------------------------------------------------------------------------------------------------------------------------|

For peer review only

| Section/topic                                                                                                                             | # | Checklist item                                                                                                                                                                                                                                                                                              | Reported on page # |
|-------------------------------------------------------------------------------------------------------------------------------------------|---|-------------------------------------------------------------------------------------------------------------------------------------------------------------------------------------------------------------------------------------------------------------------------------------------------------------|--------------------|
| <b>TITLE</b>                                                                                                                              |   |                                                                                                                                                                                                                                                                                                             |                    |
| A qualitative meta-synthesis review of the experiences of women with cardiac disease who have been, are pregnant or considering pregnancy | 1 | Identify the report as a systematic review, meta-analysis, or both. – <b>meta-synthesis</b>                                                                                                                                                                                                                 | 1                  |
| <b>ABSTRACT</b>                                                                                                                           |   |                                                                                                                                                                                                                                                                                                             |                    |
| Structured summary                                                                                                                        | 2 | Provide a structured summary including, as applicable: background; objectives; data sources; study eligibility criteria, participants, and interventions; study appraisal and synthesis methods; results; limitations; conclusions and implications of key findings; systematic review registration number. | 3-4                |
| <b>INTRODUCTION</b>                                                                                                                       |   |                                                                                                                                                                                                                                                                                                             |                    |
| Rationale                                                                                                                                 | 3 | Describe the rationale for the review in the context of what is already known.                                                                                                                                                                                                                              | 5-6                |
| Objectives                                                                                                                                | 4 | Provide an explicit statement of questions being addressed with reference to participants, interventions, comparisons, outcomes, and study design (PICOS).                                                                                                                                                  | 6                  |
| <b>METHODS</b>                                                                                                                            |   |                                                                                                                                                                                                                                                                                                             |                    |
| Protocol and registration                                                                                                                 | 5 | Indicate if a review protocol exists, if and where it can be accessed (e.g., Web address), and, if available, provide registration information including registration number. – <b>N/A</b>                                                                                                                  |                    |
| Eligibility criteria                                                                                                                      | 6 | Specify study characteristics (e.g., PICOS, length of follow-up) and report characteristics (e.g., years considered, language, publication status) used as criteria for eligibility, giving rationale.                                                                                                      | 7                  |
| Information sources                                                                                                                       | 7 | Describe all information sources (e.g., databases with dates of coverage, contact with study authors to identify additional studies) in the search and date last searched.                                                                                                                                  | 7                  |
| Search                                                                                                                                    | 8 | Present full electronic search strategy for at least one database, including any limits used, such that it could be repeated. – <b>Appendix 1.</b>                                                                                                                                                          | 32-34              |
| Study selection                                                                                                                           | 9 | State the process for selecting studies (i.e., screening, eligibility, included in systematic review, and, if applicable, included in the meta-analysis).                                                                                                                                                   | 8-9                |

|                                    |    |                                                                                                                                                                                                                        |           |
|------------------------------------|----|------------------------------------------------------------------------------------------------------------------------------------------------------------------------------------------------------------------------|-----------|
| Data collection process            | 10 | Describe method of data extraction from reports (e.g., piloted forms, independently, in duplicate) and any processes for obtaining and confirming data from investigators.                                             | 8-9       |
| Data items                         | 11 | List and define all variables for which data were sought (e.g., PICOS, funding sources) and any assumptions and simplifications made.                                                                                  |           |
| Risk of bias in individual studies | 12 | Describe methods used for assessing risk of bias of individual studies (including specification of whether this was done at the study or outcome level), and how this information is to be used in any data synthesis. | 9         |
| Summary measures                   | 13 | State the principal summary measures (e.g., risk ratio, difference in means).                                                                                                                                          | 9         |
| Synthesis of results               | 14 | Describe the methods of handling data and combining results of studies, if done, including measures of consistency (e.g., $I^2$ ) for each meta-analysis.                                                              | 9         |
| Risk of bias across studies        | 15 | Specify any assessment of risk of bias that may affect the cumulative evidence (e.g., publication bias, selective reporting within studies).                                                                           | 27        |
| Additional analyses                | 16 | Describe methods of additional analyses (e.g., sensitivity or subgroup analyses, meta-regression), if done, indicating which were pre-specified.                                                                       | N/A       |
| <b>RESULTS</b>                     |    |                                                                                                                                                                                                                        |           |
| Study selection                    | 17 | Give numbers of studies screened, assessed for eligibility, and included in the review, with reasons for exclusions at each stage, ideally with a flow diagram.                                                        | 9         |
| Study characteristics              | 18 | For each study, present characteristics for which data were extracted (e.g., study size, PICOS, follow-up period) and provide the citations.                                                                           | 10-12     |
| Risk of bias within studies        | 19 | Present data on risk of bias of each study and, if available, any outcome level assessment (see item 12).                                                                                                              |           |
| Results of individual studies      | 20 | For all outcomes considered (benefits or harms), present, for each study: (a) simple summary data for each intervention group (b) effect estimates and confidence intervals, ideally with a forest plot.               | 13-14     |
| Synthesis of results               | 21 | Present results of each meta-analysis done, including confidence intervals and measures of consistency.                                                                                                                | N/A       |
| Risk of bias across studies        | 22 | Present results of any assessment of risk of bias across studies (see Item 15).                                                                                                                                        | N/A       |
| Additional analysis                | 23 | Give results of additional analyses, if done (e.g., sensitivity or subgroup analyses, meta-regression [see Item 16]).                                                                                                  | 16-17     |
| <b>DISCUSSION</b>                  |    |                                                                                                                                                                                                                        |           |
| Summary of evidence                | 24 | Summarize the main findings including the strength of evidence for each main outcome; consider their relevance to key groups (e.g., healthcare providers, users, and policy makers).                                   | 16, 18-27 |

|    |                |    |                                                                                                                                                               |       |
|----|----------------|----|---------------------------------------------------------------------------------------------------------------------------------------------------------------|-------|
| 1  |                |    |                                                                                                                                                               |       |
| 2  |                |    |                                                                                                                                                               |       |
| 3  |                |    |                                                                                                                                                               |       |
| 4  | Limitations    | 25 | Discuss limitations at study and outcome level (e.g., risk of bias), and at review-level (e.g., incomplete retrieval of identified research, reporting bias). | 27    |
| 5  |                |    |                                                                                                                                                               |       |
| 6  | Conclusions    | 26 | Provide a general interpretation of the results in the context of other evidence, and implications for future research.                                       | 27-28 |
| 7  |                |    |                                                                                                                                                               |       |
| 8  | <b>FUNDING</b> |    |                                                                                                                                                               |       |
| 9  |                |    |                                                                                                                                                               |       |
| 10 | Funding        | 27 | Describe sources of funding for the systematic review and other support (e.g., supply of data); role of funders for the systematic review.                    | 28    |
| 11 |                |    |                                                                                                                                                               |       |
| 12 |                |    |                                                                                                                                                               |       |
| 13 |                |    |                                                                                                                                                               |       |
| 14 |                |    |                                                                                                                                                               |       |
| 15 |                |    |                                                                                                                                                               |       |
| 16 |                |    |                                                                                                                                                               |       |
| 17 |                |    |                                                                                                                                                               |       |
| 18 |                |    |                                                                                                                                                               |       |
| 19 |                |    |                                                                                                                                                               |       |
| 20 |                |    |                                                                                                                                                               |       |
| 21 |                |    |                                                                                                                                                               |       |
| 22 |                |    |                                                                                                                                                               |       |
| 23 |                |    |                                                                                                                                                               |       |
| 24 |                |    |                                                                                                                                                               |       |
| 25 |                |    |                                                                                                                                                               |       |
| 26 |                |    |                                                                                                                                                               |       |
| 27 |                |    |                                                                                                                                                               |       |
| 28 |                |    |                                                                                                                                                               |       |
| 29 |                |    |                                                                                                                                                               |       |
| 30 |                |    |                                                                                                                                                               |       |
| 31 |                |    |                                                                                                                                                               |       |
| 32 |                |    |                                                                                                                                                               |       |
| 33 |                |    |                                                                                                                                                               |       |
| 34 |                |    |                                                                                                                                                               |       |
| 35 |                |    |                                                                                                                                                               |       |
| 36 |                |    |                                                                                                                                                               |       |
| 37 |                |    |                                                                                                                                                               |       |
| 38 |                |    |                                                                                                                                                               |       |
| 39 |                |    |                                                                                                                                                               |       |
| 40 |                |    |                                                                                                                                                               |       |
| 41 |                |    |                                                                                                                                                               |       |
| 42 |                |    |                                                                                                                                                               |       |
| 43 |                |    |                                                                                                                                                               |       |
| 44 |                |    |                                                                                                                                                               |       |
| 45 |                |    |                                                                                                                                                               |       |
| 46 |                |    |                                                                                                                                                               |       |

1  
2  
3  
4  
5  
6  
7  
8  
9  
10  
11  
12  
13  
14  
15  
16  
17  
18  
19  
20  
21  
22  
23  
24  
25  
26  
27  
28  
29  
30  
31  
32  
33  
34  
35  
36  
37  
38  
39  
40  
41  
42  
43  
44  
45  
46  
47  
48  
49  
50  
51  
52  
53  
54  
55  
56  
57  
58  
59  
60

For peer review only

# BMJ Open

## Experiences of women with cardiac disease in pregnancy: A systematic review and meta-synthesis

|                                 |                                                                                                                                                                                                                                                                                                                                                                                                                                                                                                                                                                                                                                                               |
|---------------------------------|---------------------------------------------------------------------------------------------------------------------------------------------------------------------------------------------------------------------------------------------------------------------------------------------------------------------------------------------------------------------------------------------------------------------------------------------------------------------------------------------------------------------------------------------------------------------------------------------------------------------------------------------------------------|
| Journal:                        | <i>BMJ Open</i>                                                                                                                                                                                                                                                                                                                                                                                                                                                                                                                                                                                                                                               |
| Manuscript ID                   | bmjopen-2018-022755.R1                                                                                                                                                                                                                                                                                                                                                                                                                                                                                                                                                                                                                                        |
| Article Type:                   | Research                                                                                                                                                                                                                                                                                                                                                                                                                                                                                                                                                                                                                                                      |
| Date Submitted by the Author:   | 03-Jul-2018                                                                                                                                                                                                                                                                                                                                                                                                                                                                                                                                                                                                                                                   |
| Complete List of Authors:       | Dawson, Angela; University of Technology, Sydney, Australian Centre for Public and Population Health Research<br>Krastev , Yordanka; University of Technology, Sydney, Australian Centre for Public and Population Health Research<br>Parsonage, William; Royal Brisbane and Women's Hospital, ; Queensland University of Technology,<br>Peek, Michael; Australian National University, ANU Medical School<br>Lust, Karin; University of Queensland, Women's and Newborn Services, Royal Brisbane and Women's Hospital<br>Sullivan, Elizabeth; University of Technology Sydney Faculty of Health, Australian Centre for Public and Population Health Research |
| <b>Primary Subject Heading</b>: | Obstetrics and gynaecology                                                                                                                                                                                                                                                                                                                                                                                                                                                                                                                                                                                                                                    |
| Secondary Subject Heading:      | Cardiovascular medicine                                                                                                                                                                                                                                                                                                                                                                                                                                                                                                                                                                                                                                       |
| Keywords:                       | Pregnancy, cardiac disease, women centered care, shared decision-making, qualitative meta-synthesis                                                                                                                                                                                                                                                                                                                                                                                                                                                                                                                                                           |
|                                 |                                                                                                                                                                                                                                                                                                                                                                                                                                                                                                                                                                                                                                                               |

SCHOLARONE™  
Manuscripts



1  
2  
3 **Experiences of women with cardiac disease in pregnancy: A systematic review and meta-**  
4  
5 **synthesis**  
6  
7  
8

9 Angela J. Dawson, Australian Centre for Public and Population Health Research, Faculty of  
10  
11 Health, University of Technology Sydney, Sydney, NSW, Australia  
12  
13

14  
15  
16 Yordanka Krastev, Australian Centre for Public and Population Health Research, Faculty of  
17  
18 Health, University of Technology Sydney; Clinical Research Manager, MQ Health, Macquarie  
19  
20 University, Sydney, NSW, Australia  
21  
22

23  
24  
25 William A. Parsonage, Senior Staff Cardiologist, Royal Brisbane and Women's Hospital;  
26  
27 Clinical Director AusHSI, IHBI, Queensland University of Technology, Brisbane, Queensland,  
28  
29 Australia  
30  
31

32  
33  
34 Michael Peek, Associate Dean and Professor of Obstetrics and Gynaecology, Department of  
35  
36 Obstetrics and Gynaecology, Medical School, College of Health and Medicine, The Australian  
37  
38 National University; Obstetrics and Gynaecology Administration; Women Youth and  
39  
40 Children Administration Offices; Centenary Hospital for Women and Children, Canberra  
41  
42 Hospital, Canberra, Australian Capital Territory, Australia  
43  
44  
45

46  
47  
48 Karin Lust, Clinical Director, Obstetrics and Gynaecology, General & Obstetric Physician,  
49  
50 University of Queensland, Women's and Newborn Services, Royal Brisbane and Women's  
51  
52 Hospital, Brisbane, Queensland, Australia  
53  
54  
55

1  
2  
3 \*Elizabeth A. Sullivan, Professor Public Health and Director, Australian Centre for Public and  
4  
5 Population Health Research, Faculty of Health, University of Technology Sydney, Level 8, 235  
6  
7 Jones St, Ultimo NSW 2007, (PO Box 123), Sydney, New South Wales, Australia, +61 2 9514  
8  
9  
10 3492, [Elizabeth.Sullivan@uts.edu.au](mailto:Elizabeth.Sullivan@uts.edu.au)

11  
12 \*Corresponding author  
13

14  
15  
16 Word count: 4,224  
17  
18  
19  
20  
21  
22  
23  
24  
25  
26  
27  
28  
29  
30  
31  
32  
33  
34  
35  
36  
37  
38  
39  
40  
41  
42  
43  
44  
45  
46  
47  
48  
49  
50  
51  
52  
53  
54  
55  
56  
57  
58  
59  
60

## ABSTRACT

### Objective

Cardiac disease in pregnancy is a leading cause of maternal death in high-income countries. Evidence-based guidelines to assist in planning and managing the healthcare of affected women is lacking. The objective of this research was to produce the first qualitative meta-synthesis of the experiences of pregnant women with existing or acquired cardiac disease to inform improved healthcare services.

### Method

We conducted a systematic search of peer-reviewed publications in five databases to investigate the decision-making processes, supportive strategies and healthcare experiences of pregnant women with existing or acquired cardiac disease, or of affected women contemplating pregnancy. Identified publications were screened for duplication and eligibility against selection criteria, following PRISMA guidelines. We then undertook a thematic analysis of the data relating to women's experiences extracted from each publication to inform new healthcare practices and communication.

### Results

Eleven studies from six countries were included in our meta-synthesis. Four themes were revealed. Women with congenital and acquired heart disease identified situations where they had either taken charge of decision-making, lacked control, or experienced emotional uncertainty when making decisions. Some women were risk aware and determined to take care of themselves in pregnancy while others downplayed the risks. Women with heart disease acknowledged the importance of specific social support measures during pregnancy and after child birth, and reported a spectrum of healthcare experiences.

### Conclusions

1  
2  
3 There is a lack of integrated and tailored healthcare services and information for women  
4  
5 with cardiac disease in pregnancy. The experiences of women synthesised in this research  
6  
7 has the potential to inform new evidence-based guidelines to support the decision-making  
8  
9 needs of women with cardiac disease in pregnancy. Shared decision-making must consider  
10  
11 communication across the clinical team. However, coordinated care is challenging due to  
12  
13 the different specialists involved and the limited clinical evidence concerning effective  
14  
15 approaches to managing such complex care.  
16  
17

18  
19  
20  
21 **Keywords:** Pregnancy, cardiac disease, women-centred care, shared decision-making,  
22  
23 qualitative meta-synthesis.  
24  
25

## 26 27 28 **Article Summary**

### 29 30 **Strengths and limitations of this study**

- 31  
32 • This is the first meta-synthesis of qualitative research that investigated the  
33  
34 experiences of pregnant women with a spectrum of cardiac disease.
- 35  
36 • The small number of studies in this synthesis demonstrated the paucity of qualitative  
37  
38 research in this area, particularly the voices of pregnant women with genetic  
39  
40 conditions.  
41  
42
- 43  
44 • The thematic analysis enabled patterns to be discerned that could be translated to  
45  
46 cardiac disease in pregnancy and potentially other rare and chronic diseases in  
47  
48 pregnancy.  
49  
50
- 51  
52 • Our multi-disciplinary research team enabled a rich and detailed yet complex  
53  
54 account of the extracted data.  
55  
56  
57  
58  
59  
60

## INTRODUCTION

Cardiac disease in pregnancy is a leading cause of maternal death in the developed world. In the United States, pregnancy related deaths due to cardiovascular disease were ranked as the leading category of death from 2011 to 2013 at 15.5%<sup>1</sup>. In the United Kingdom, the rate of maternal deaths associated with cardiac disease more than doubled from 1.0 in 1985 to 2.3 per 100,000 maternities in 2008<sup>2</sup>. In Australia, cardiac disease in pregnancy has been the leading cause of indirect maternal deaths for almost 50 years<sup>3,4</sup>, and a common cause of late maternal death<sup>4,5</sup>.

Cardiac disease in pregnancy constitutes a broad spectrum of conditions, including congenital heart diseases (e.g. ventricular septal defect, transposition of the great vessels), genetic heart diseases (e.g. hypertrophic cardiomyopathy, long QT syndrome, Brugada syndrome), chronic arrhythmia conditions (e.g. Wolff Parkinson White syndrome), as well as heart diseases acquired before or during pregnancy (e.g. rheumatic heart disease, ischemic heart disease, peripartum cardiomyopathy). Heart transplants can also affect pregnancy outcomes.

Cardiac disease in pregnancy is associated with high rates of morbidity and hospitalisation: 15% of women in Europe have been admitted for cardiac indications during pregnancy<sup>6</sup>. Approximately one in four women with cardiac disease in pregnancy are hospitalised during pregnancy, and overall cardiac disease in pregnancy is associated with the increased likelihood of eclampsia, caesarean birth and postpartum haemorrhage<sup>6</sup>. For the baby, there is an increased likelihood of stillbirth, preterm birth and acquired congenital disease<sup>6</sup>. The European Registry of Pregnancy and Cardiac Disease has reported significant adverse

1  
2  
3 perinatal outcomes for both mother and baby, most notably a maternal mortality rate of  
4  
5 1%, which is more than 100-times the rate for women without cardiac disease.  
6  
7

8  
9  
10 Confidential death enquiry data from the UK suggest there are an increasing number of  
11  
12 women who die from the combination of pregnancy and cardiac disease <sup>2</sup>. There are several  
13  
14 possible explanations for this observation, including the improved survival (~90%) of  
15  
16 children with congenital heart disease to adulthood, increased awareness and diagnosis of  
17  
18 genetic conditions, lifestyle factors (e.g. obesity), and older maternal age associated with  
19  
20 ischemic heart disease <sup>7-9</sup>.  
21  
22

23  
24  
25  
26 Many women with cardiac disease have been found to have high rates of unintended  
27  
28 pregnancies that may reflect issues concerning the attitudes of healthcare professionals  
29  
30 with providing counselling, and gaps in women's contraceptive knowledge and availability of  
31  
32 decision-making support <sup>10 11</sup>. Despite clinical available guidelines <sup>12-14</sup>, limited knowledge  
33  
34 exists regarding the healthcare, support and decision-making experiences of women with  
35  
36 cardiac disease who are pregnant, or contemplating pregnancy. Insights into women's  
37  
38 experiences of planning and undergoing pregnancy including their perceptions and  
39  
40 satisfaction are critical to the provision of health services, care and information.  
41  
42  
43

44  
45  
46 This paper aims to synthesise qualitative healthcare evidence to deliver new insights to best  
47  
48 support decision-making for women with cardiac disease and for healthcare professionals to  
49  
50 improve their quality of cardiac care from pre-conception planning to the postnatal period.  
51  
52

## 53 54 55 **METHODS**

### Data sources and search strategy

We undertook a qualitative systematic review of the literature and conducted a meta-analysis following methods outlined by Thomas and Harden<sup>15</sup> to understand the healthcare experiences of pregnant women or women contemplating pregnancy with existing or acquired cardiac disease, in order to gain insights into their resilience including coping strategies.

We used the PRISMA statement (Fig. 1) with a cut-off date of 2016. We searched the literature available in five on-line, bibliographic databases: CINAHL Plus (1995–October 2016); Embase (1996–October 2016); Ovid MEDLINE (1996–October 2016); PsycINFO (1984–October 2016) and the Joanna Briggs Institute Evidence Based Practice Database (1996–October 2016). Boolean operators (and, or, not) were used to refine our search with the following keywords: cardiac disease, pregnancy, pregnant women, decision-making, and shared decision-making. Publications that met our selection criteria (Table 1) were further analysed. We also searched for publications in Google Scholar and manually from the reference lists of key papers that identified an additional 19 relevant publications. See Appendix 1 (supplementary file) for details of the bibliographic search strategy.

### Figure1. PRISMA Flowchart of Cardiac Disease in Pregnancy

**Table 1. Inclusion and exclusion criteria used to identify publications that involved women with cardiac disease in pregnancy**

| Inclusion Criteria                                                                                                                                                                                                                                          | Exclusion Criteria                                                                                        |
|-------------------------------------------------------------------------------------------------------------------------------------------------------------------------------------------------------------------------------------------------------------|-----------------------------------------------------------------------------------------------------------|
| The experiences of women of reproductive age with existing or acquired cardiac disease in pregnancy who were, or had been pregnant, or who had contemplated pregnancy (including preconception, and prenatal, intrapartum, perinatal and postnatal periods) | Women with cardiac disease who were not of reproductive age or who had not been or contemplated pregnancy |
| Qualitative studies                                                                                                                                                                                                                                         | Quantitative studies                                                                                      |
| Mixed methods design with a qualitative component                                                                                                                                                                                                           | Clinical studies of cardiac disease in pregnancy                                                          |
| Published in the English language                                                                                                                                                                                                                           | Non-English articles                                                                                      |

### Quality assessment and data extraction

Nineteen potentially relevant publications were identified. Of these, eight were excluded because they were either irrelevant or not peer-reviewed (e.g. PhD thesis). Six qualitative publications and the qualitative components of five mixed methods publications were appraised using the Critical Appraisal Skills Program (CASP) qualitative checklist<sup>16</sup> by two authors (AD and YK). Each paper was independently assessed using a table with ten CASP questions that analysed the data sampling, collection and analysis processes and the coherence of the paradigm underpinning the study involving the fit between the data gathered and the conceptual work of analysis and interpretation. Despite the methodological limitations of some papers, including gaps in the discussion of reflexivity and credibility, all 11 papers were included in the meta-synthesis as it was deemed that their strengths outweighed these issues. Data from the findings sections of each publication, that detailed the preconception planning and pregnancy experiences of women with cardiac



1  
2  
3 disease, were extracted for further analysis. This included direct quotes and text describing  
4  
5 related findings.  
6  
7  
8

### 9 10 **Data analysis**

11  
12 The extracted text was coded 'line-by-line' by two authors (AD and YK) and then descriptive  
13  
14 categories were developed that aligned with the original studies. The concepts from the  
15  
16 descriptive categories were grouped into themes and sub themes and conceptual links  
17  
18 among themes were identified. Tables were used for this process. Emerging descriptor texts  
19  
20 were highlighted in different colours in each study in each paper. These descriptors were  
21  
22 then compared across papers and similar descriptors were synthesised into one table. This  
23  
24 led to the conflation of descriptive themes and the development of emergent categories  
25  
26 whose meaning was refined in order to answer the research questions and address the aim  
27  
28 of the study<sup>17</sup>.  
29  
30  
31  
32  
33  
34

### 35 **Patient and public involvement**

36  
37 Qualitative patient data was the focus of this synthesis; however, patients and the public  
38  
39 were not involved in the design of the study or analysis of the data.  
40  
41  
42  
43  
44  
45  
46  
47  
48  
49  
50  
51  
52  
53  
54  
55  
56  
57  
58  
59  
60

## RESULTS

A summary of the methodology and findings of the 11 studies used in this study is given in

Table 2. The studies were conducted across six countries: The United States of America

(n=5), Australia (n=2), Sweden, (n=2), Canada (n=1), Norway (n=1) and Belgium (n=1). Six

studies comprised qualitative designs<sup>18-23</sup> and five used mixed methods<sup>24-28</sup> (see Table 3).

There were a total of 383 women participants with the following conditions: congenital

heart disease (n = 81), peripartum cardiomyopathy (PPCM; n = 298), and Long QT syndrome

see Table 3; n = 4).

**Table 2. Summary of the methodology and data of the 11 publications used in this study**

| Publication                        | Method                                                         | Aim                                                                                                                                                                                                                                                                                        | Findings                                                                                                                                                                                                                                                                                                         |
|------------------------------------|----------------------------------------------------------------|--------------------------------------------------------------------------------------------------------------------------------------------------------------------------------------------------------------------------------------------------------------------------------------------|------------------------------------------------------------------------------------------------------------------------------------------------------------------------------------------------------------------------------------------------------------------------------------------------------------------|
| Andersen et al. 2008 <sup>18</sup> | Qualitative: in-depth, face-to-face interviews                 | <ul style="list-style-type: none"> <li>To investigate psychosocial aspects of living with Long QT Syndrome(LQTS)</li> <li>To identify the daily challenges and coping strategies of LQTS patients</li> <li>To describe the experience of LQTS patients with healthcare services</li> </ul> | <ul style="list-style-type: none"> <li>LQTS patients were concerned that the condition would be inherited by their children and grandchildren.</li> <li>LQTS patients favoured early genetic testing for LGTS, and the provision of information about LQTS in children presented early and gradually.</li> </ul> |
| Claessens et al.2005 <sup>19</sup> | Qualitative: unstructured, in-depth interviews                 | <ul style="list-style-type: none"> <li>To explore the lived experiences of adult congenital heart disease patients</li> </ul>                                                                                                                                                              | <ul style="list-style-type: none"> <li>The central theme of the patients' lived experiences was "feeling different". Patients struggled constantly with themselves and with their environment to be accepted as normal.</li> </ul>                                                                               |
| Dekker et al. 2016 <sup>22</sup>   | Publicly available narratives from three online support groups | <ul style="list-style-type: none"> <li>To describe the experience of women diagnosed with Peripartum Cardiomyopathy (PPCM)</li> </ul>                                                                                                                                                      | <ul style="list-style-type: none"> <li>Nearly 40% of women felt that they were dismissed by health-care providers. Women had difficulty caring for their newborns during the postnatal period, and they struggled with the medical advice they received to not conceive again.</li> </ul>                        |

| Publication                    | Methods                                                            | Aim                                                                                                                                                                                                       | Findings                                                                                                                                                                                                                                                                                                                                                                                                                                                                                                                                           |
|--------------------------------|--------------------------------------------------------------------|-----------------------------------------------------------------------------------------------------------------------------------------------------------------------------------------------------------|----------------------------------------------------------------------------------------------------------------------------------------------------------------------------------------------------------------------------------------------------------------------------------------------------------------------------------------------------------------------------------------------------------------------------------------------------------------------------------------------------------------------------------------------------|
| Gantt 1992 <sup>21</sup>       | Qualitative: unstructured face to face interviews; Grounded-Theory | <ul style="list-style-type: none"> <li>To generate an understanding of, and theories about, the lives of women with congenital heart disease</li> </ul>                                                   | <ul style="list-style-type: none"> <li>Lack of information related to women's bodies and reproductive issues ("growing up female").</li> <li>Over involvement of mothers and healthcare professionals in the affairs of the child's and woman's body, resulting in decreased ownership of the body by the woman ("living against the body").</li> <li>Poor self-esteem, self-concept, and body image ("growing up heartsick").</li> <li>A need for various types of counselling for women with congenital heart disease was identified.</li> </ul> |
| Gantt 2002 <sup>20</sup>       | Qualitative: descriptive with unstructured interviews              | <ul style="list-style-type: none"> <li>To study the effect of congenital heart diseases on the mother–daughter relationship</li> </ul>                                                                    | <ul style="list-style-type: none"> <li>Overriding theme of the study was normalising in the face of chronic illness, with a tendency by the mothers and daughters to focus on their lives instead of their relationship with one another.</li> </ul>                                                                                                                                                                                                                                                                                               |
| Hess et al. 2010 <sup>26</sup> | Descriptive: a survey of open-ended and Likert-type questions      | <ul style="list-style-type: none"> <li>To determine the benefits of participation in the on-line support group for peripartum cardiomyopathy, based on a survey of active members of the group</li> </ul> | <ul style="list-style-type: none"> <li>One of the most important issues facing women with peripartum cardiomyopathy is future childbearing.</li> <li>The benefits of participation in the online support group included obtaining and sharing information, exchanging stories, being understood by other women and reassurance.</li> </ul>                                                                                                                                                                                                         |
| Hess et al. 2012 <sup>27</sup> | Mixed method: analysis of social media postings made by 156 people | <ul style="list-style-type: none"> <li>To describe the contents of postings made on the My Space® peripartum cardiomyopathy support group website by women with peripartum cardiomyopathy</li> </ul>      | <ul style="list-style-type: none"> <li>The subject of pregnancy subsequent to the diagnosis of peripartum cardiomyopathy was mentioned 102 times (amongst 247 posts), making it an issue that was foremost in the minds of many women.</li> </ul>                                                                                                                                                                                                                                                                                                  |

1  
2  
3  
4  
5  
6  
7  
8  
9  
10  
11  
12  
13  
14  
15  
16  
17  
18  
19  
20  
21  
22  
23  
24  
25  
26  
27  
28  
29  
30  
31  
32  
33  
34  
35  
36  
37  
38  
39  
40  
41  
42  
43  
44  
45  
46  
47

| Publication                                    | Methods                                                                                    | Aim                                                                                                                                                                                                                                                                                                                 | Findings                                                                                                                                                                                                                                                                                                                                              |
|------------------------------------------------|--------------------------------------------------------------------------------------------|---------------------------------------------------------------------------------------------------------------------------------------------------------------------------------------------------------------------------------------------------------------------------------------------------------------------|-------------------------------------------------------------------------------------------------------------------------------------------------------------------------------------------------------------------------------------------------------------------------------------------------------------------------------------------------------|
| Ngu et al. 2014 <sup>25</sup>                  | Mixed method: retrospective and descriptive                                                | <ul style="list-style-type: none"> <li>To assess the perceptions of women with congenital heart disease regarding the severity of their cardiac abnormality and its implications in pregnancy, and whether their motivations to conceive were similar to those of women without congenital heart disease</li> </ul> | <ul style="list-style-type: none"> <li>The personal experience of women, who successfully lived with their heart condition, influenced their perception of the pregnancy risks.</li> <li>Women with congenital heart disease were concerned about the health risks associated with their congenital heart disease and that of their child.</li> </ul> |
| Ngu et al. 2014 <sup>24</sup>                  | Mixed method: Case studies                                                                 | <ul style="list-style-type: none"> <li>To understand the motivations of women with congenital heart disease to bear children, and to assess if there were any differences between the cohort with low risk and those with high risk heart disease</li> </ul>                                                        | <ul style="list-style-type: none"> <li>Women with high risk (moderate to severe) congenital heart disease appeared to have similar motivations for conceiving as women with low-risk (mild) congenital heart disease. Their drive for motherhood appeared to be stronger than their drive for self-care.</li> </ul>                                   |
| Patel, Berg et al 2016 <sup>28</sup>           | Mixed method: qualitative face-to-face and telephone interviews; review of medical records | <ul style="list-style-type: none"> <li>To explore and describe the experiences of symptoms in peripartum cardiomyopathy in women</li> </ul>                                                                                                                                                                         | <ul style="list-style-type: none"> <li>A sense of being caught in a spider web consisting of the invasion of the body by experienced symptoms and a feeling of helplessness.</li> </ul>                                                                                                                                                               |
| Patel, Schaufelberge et al. 2016 <sup>23</sup> | Qualitative: unstructured interviews                                                       | <ul style="list-style-type: none"> <li>To explore the healthcare experience of women during their diagnosis with peripartum cardiomyopathy</li> </ul>                                                                                                                                                               | <ul style="list-style-type: none"> <li>The main theme was "Exacerbated Suffering" expressed in three subthemes: "not being cared about", "not being cared for", and "not feeling secure".</li> </ul>                                                                                                                                                  |

**Table 3. Summary of the conditions, participants and study locations and of the 11 publications used in this review**

| Publication                         | Condition                                                                                                                                                                                                          |                              | Country | Number of participants                                                                                                                                                                         | Age range (years)                                                |
|-------------------------------------|--------------------------------------------------------------------------------------------------------------------------------------------------------------------------------------------------------------------|------------------------------|---------|------------------------------------------------------------------------------------------------------------------------------------------------------------------------------------------------|------------------------------------------------------------------|
|                                     | Congenital heart disease                                                                                                                                                                                           | Other acquired heart disease |         |                                                                                                                                                                                                |                                                                  |
| Andersen et al. 2008 <sup>18</sup>  | Long QT Syndrome                                                                                                                                                                                                   |                              | Norway  | Adults (n = 7):<br>4 women, 3 men                                                                                                                                                              | 23–76 (n = 7)                                                    |
| Claessens et al. 2005 <sup>19</sup> | Moderate or severe heart defects, such as Tetralogy of Fallot, univentricular heart, VSD and aortic valve stenosis, transposition of the great arteries                                                            |                              | Belgium | Adult patients (n = 12):<br>6 women; 6 men                                                                                                                                                     | 25–40 (n = 12)                                                   |
| Dekker et al. 2016 <sup>22</sup>    |                                                                                                                                                                                                                    | Peripartum Cardiomyopathy    | USA     | Adult women (n = 92):<br>1 <sup>st</sup> pregnancy (n = 49) 2 <sup>nd</sup> pregnancy (n = 24) 3 <sup>rd</sup> pregnancy (n = 10) >4 <sup>th</sup> higher pregnancy (n = 8) unreported (n = 1) | 17–41 (n = 92)                                                   |
| Gantt 1992 <sup>21</sup>            | Transposition of the great vessels (TOGV), pulmonary atresia, atrial septal defect (ASD), double outlet right ventricle, pulmonary stenosis, truncus arteriosus, coarctation of the aorta                          |                              | USA     | Adolescent, young adults (n = 13)                                                                                                                                                              | 13–15 (n = 3)<br>16–18 (n = 4)<br>19–21 (n = 3)<br>22–28 (n = 3) |
| Gantt 2002 <sup>20</sup>            | One woman with childhood rheumatic fever; one adolescent woman had a heart murmur only; all other women had congenital heart diseases of varying types and severity that had been surgically repaired or palliated |                              | USA     | Adults and children (n = 22):<br>11 mothers and 11 daughters                                                                                                                                   | 30–60<br>9-18                                                    |

1  
2  
3  
4  
5  
6  
7  
8  
9  
10  
11  
12  
13  
14  
15  
16  
17  
18  
19  
20  
21  
22  
23  
24  
25  
26  
27  
28  
29  
30  
31  
32  
33  
34  
35  
36  
37  
38  
39  
40  
41  
42  
43  
44  
45  
46  
47

| Publication                    | Condition                                                                                                                                                                                                                                                                                                                       |                              | Country   | Number of participants                                                                                | Age range (years)                                                                                       |
|--------------------------------|---------------------------------------------------------------------------------------------------------------------------------------------------------------------------------------------------------------------------------------------------------------------------------------------------------------------------------|------------------------------|-----------|-------------------------------------------------------------------------------------------------------|---------------------------------------------------------------------------------------------------------|
|                                | Congenital heart disease                                                                                                                                                                                                                                                                                                        | Other acquired heart disease |           |                                                                                                       |                                                                                                         |
| Hess et al. 2010 <sup>26</sup> |                                                                                                                                                                                                                                                                                                                                 | Peripartum Cardiomyopathy    | USA       | Adult women (n = 12):<br>7 women did not have other children prior to the diagnosis                   | 19–34 (n = 12)                                                                                          |
| Hess et al. 2012 <sup>27</sup> |                                                                                                                                                                                                                                                                                                                                 | Peripartum Cardiomyopathy    | USA       | Adults (n = 156):<br>148 (95%) women with PPCM<br>8 (5%) husbands, mothers, sisters and grandmothers. | ~27 (n = 156)                                                                                           |
| Ngu et al. 2014 <sup>25</sup>  | Mild: pulmonary atresia, moderately large VSD, transposition of the great vessels, coarctation of aorta, bicuspid aortic valve, Ebstein’s anomaly of tricuspid valve<br><br>Moderate: Tetralogy of Fallot, mitral valve dysplasia, sub aortic stenosis<br><br>Severe: VSD; aortic valve stenosis, double outlet right ventricle |                              | Australia | Women with (n = 20) or without (n = 20) CHD aged >18 years, who had ≥1 successful pregnancy.          | 32.6 ± 5.3 Women with congenital heart disease<br><br>33.9 ± 5.2 Women without congenital heart disease |

For peer review only

| Publication                                   | Condition                                                                                                                                                                                                                                                                                                                            |                              | Country   | Number of participants                                                                                                                                                                                                       | Age range (years)                                                                                                 |
|-----------------------------------------------|--------------------------------------------------------------------------------------------------------------------------------------------------------------------------------------------------------------------------------------------------------------------------------------------------------------------------------------|------------------------------|-----------|------------------------------------------------------------------------------------------------------------------------------------------------------------------------------------------------------------------------------|-------------------------------------------------------------------------------------------------------------------|
|                                               | Congenital heart disease                                                                                                                                                                                                                                                                                                             | Other acquired heart disease |           |                                                                                                                                                                                                                              |                                                                                                                   |
| Ngu et al. 2014 <sup>24</sup>                 | Mild: pulmonary atresia, moderately large VSD, transposition of the great vessels, coarctation of the aorta, bicuspid aortic valve, Ebstein's anomaly of tricuspid valve<br><br>Moderate: Tetralogy of Fallot,; mitral valve dysplasia, sub aortic stenosis<br><br>Severe: VSD; aortic valve stenosis; double outlet right ventricle |                              | Australia | Women with mild CHD (n = 10) with:<br>1 child (n = 4)<br>2 children (n = 4)<br>3 children (n = 2).<br><br>Women with moderate to severe CHD (n = 10) with:<br>1 child (n = 5);<br>2 children (n = 3);<br>3 children (n = 2). | 35.8 ± 5.9 (n = 10): women with mild – CHD-mean age<br><br>28.9 ± 3.5 (n = 10): women with moderate to severe CHD |
| Patel, Berg et al. 2016 <sup>28</sup>         |                                                                                                                                                                                                                                                                                                                                      | Peripartum Cardiomyopathy    | Sweden    | Adult Women (n = 19)                                                                                                                                                                                                         | 28–46 (n = 19)*                                                                                                   |
| Patel, Schaufelberg et al. 2016 <sup>23</sup> |                                                                                                                                                                                                                                                                                                                                      | Peripartum Cardiomyopathy    | Sweden    | Women (n = 19)                                                                                                                                                                                                               | 28–46 (n = 19)*                                                                                                   |

\*Separate studies drawing upon data from the same cohort of women



1  
2  
3  
4  
5  
6  
7  
8  
9  
10  
11  
12  
13  
14  
15  
16  
17  
18  
19  
20  
21  
22  
23  
24  
25  
26  
27  
28  
29  
30  
31  
32  
33  
34  
35  
36  
37  
38  
39  
40  
41  
42  
43  
44  
45  
46  
47  
48  
49  
50  
51  
52  
53  
54  
55  
56  
57  
58  
59  
60

Four themes and seven sub-themes emerged from our meta-analysis and are summarised in Table 4 and described in more detail below.

For peer review only

**Table 4. Frequency of themes in women with cardiac disease in pregnancy identified in the literature**

| Publication                                    | Themes: | Women's autonomy and control     |                 |                                          |                                      | Self-care and risk awareness in pregnancy | Social support for decision-making | Health care experiences  |                 |                    |
|------------------------------------------------|---------|----------------------------------|-----------------|------------------------------------------|--------------------------------------|-------------------------------------------|------------------------------------|--------------------------|-----------------|--------------------|
|                                                |         | Taking charge of decision-making | Lack of control | Emotional uncertainty of decision-making | Helplessness, fear and vulnerability |                                           |                                    | Health information needs | Responsive care | Listening to women |
| Congenital heart disease                       |         |                                  |                 |                                          |                                      |                                           |                                    |                          |                 |                    |
| Andersen et al 2008 <sup>18</sup>              | ✓       | ✓                                | ✓               | ✓                                        | ✓                                    | ✓                                         | ✓                                  |                          |                 |                    |
| Claessens et al. 2005 <sup>19</sup>            | ✓       | ✓                                | ✓               | ✓                                        |                                      |                                           |                                    |                          |                 |                    |
| Gantt 2002 <sup>20</sup>                       | ✓       |                                  |                 | ✓                                        | ✓                                    |                                           |                                    |                          |                 |                    |
| Gantt 1992 <sup>21</sup>                       | ✓       | ✓                                |                 |                                          | ✓                                    |                                           |                                    | ✓                        |                 | ✓                  |
| Ngu et al. 2014 <sup>24</sup>                  |         |                                  |                 |                                          | ✓                                    | ✓                                         |                                    |                          | ✓               |                    |
| Ngu et al. 2014 <sup>25</sup>                  | ✓       |                                  |                 |                                          | ✓                                    | ✓                                         |                                    |                          |                 |                    |
| Other acquired heart disease                   |         |                                  |                 |                                          |                                      |                                           |                                    |                          |                 |                    |
| Dekker et al. 2016 <sup>22</sup>               |         |                                  | ✓               | ✓                                        | ✓                                    |                                           |                                    | ✓                        | ✓               | ✓                  |
| Hess et al. 2010 <sup>26</sup>                 | ✓       |                                  |                 |                                          |                                      | ✓                                         | ✓                                  | ✓                        |                 | ✓                  |
| Hess et al. 2012 <sup>27</sup>                 | ✓       |                                  |                 |                                          |                                      |                                           | ✓                                  |                          |                 | ✓                  |
| Patel, Berg et al. 2016 <sup>28</sup>          |         |                                  |                 | ✓                                        | ✓                                    |                                           |                                    |                          |                 |                    |
| Patel, Schaufelberge et al. 2016 <sup>23</sup> |         |                                  |                 |                                          | ✓                                    |                                           |                                    |                          | ✓               | ✓                  |

## Women's autonomy and control

### *Taking charge of decision-making*

Some women expressed their determination to take control and make their own decisions regarding their pregnancies. One woman was resolute to try to fall pregnant and if unsuccessful wanted to consider other options: "I want to give birth to at least one child. I want to have the opportunity to do that, then later I can adopt ..." <sup>18</sup>. Another woman became pregnant two months after her diagnosis of heart disease and described being "told to terminate her pregnancy" but she "refused" <sup>27</sup>. Another woman felt she "had lived a good life" and her disease "could not be considered a reason for terminating a pregnancy" <sup>18</sup>. The positive thinking that "life isn't over just because you have peripartum cardiomyopathy" and the possibility of having more children was a key factor driving the decision of women who went through another pregnancy and "received a beautiful little girl in exchange" <sup>26</sup>.

The trust that women had in their clinicians and their experiences of successfully adapting to their congenital cardiac disease by developing coping mechanisms, played a role in their desire to make their own decisions and proceed with their pregnancies <sup>25</sup>. Some women felt that they had to take responsibility not only for their own health, but also for that of future generations. These women undertook genetic testing as early as possible <sup>18</sup> to prevent giving birth to a child with congenital heart disease <sup>21</sup>.

Women desired to take control and live a "normal life" <sup>20 24</sup>, participate in social activities and "fit in" <sup>21</sup>. This often stemmed from childhood experiences of being excluded and "feeling different" <sup>21</sup>. For some women, this motivated them to make their own decisions

1  
2  
3 and to take on new and different activities as a means of coping: "I do these things just to  
4  
5 challenge those boundaries, limitations" <sup>19</sup>.  
6  
7

### 8 9 *A lack of control*

10  
11 In contrast, a lack of autonomy and control was noted by women in relation to pregnancy  
12  
13 decision-making. Some women believed that someone else would decide whether they  
14  
15 should become pregnant in response to being "told right from the beginning not to have any  
16  
17 more children" <sup>22</sup>. Another woman felt that she had no choice and could not take the risk  
18  
19 and have her family shoulder the burden of another episode of heart failure <sup>21</sup>. Others  
20  
21 described feeling how social pressure and the judgment of others interfered with their  
22  
23 decision to have more children: "you're not supposed to get pregnant when you have  
24  
25 congenital heart disease" <sup>21</sup>. Another woman, who already had a child diagnosed with heart  
26  
27 condition, feared being perceived as "selfish" <sup>18</sup>.  
28  
29  
30  
31  
32  
33  
34

35 For some of the women, their heart disease defined and dominated their decision-making  
36  
37 <sup>18</sup>. One woman talked of how everything in her life "came down to the heart" <sup>21</sup>. While  
38  
39 another described the tension the control of their disease had over them, and their own  
40  
41 autonomy to make decisions, including those about pregnancy: "I do make plans and that  
42  
43 sort of thing, but I don't dare to carry them out. Now I understand that ...I must start  
44  
45 something independently ...but I'm scared" <sup>19</sup>. A lack of autonomy and control was  
46  
47 discussed by women in relation to financial hardship. Some women said that they had  
48  
49 registered for disability payments after their diagnosis and were concerned that they would  
50  
51 not be able to work after giving birth and contribute to the household income due to the  
52  
53  
54  
55  
56  
57  
58  
59  
60

1  
2  
3 impact the pregnancy would have on their physical and mental health. As a result, these  
4  
5 women felt they would be financially dependent upon others <sup>22</sup>.  
6  
7

### 8 9 *The emotional uncertainty of decision-making*

10  
11 In three studies, women described the emotional uncertainty of their pre-conception  
12  
13 decision-making in highly emotional terms, where they were at a loss regarding what to do  
14  
15 <sup>18 19</sup>. One woman asked 'Is it worth it having a baby?' <sup>28</sup>. Women expressed feelings of being  
16  
17 depressed, devastated, experiencing "emotional torture", feeling "hysterical" when they  
18  
19 were diagnosed with cardiac disease and advised by their doctors against future  
20  
21 pregnancies <sup>22</sup>. These circumstances required them to re-think their situation <sup>22</sup>. Several  
22  
23 women described the decisions regarding pregnancy and childbirth as extremely difficult for  
24  
25 them <sup>18</sup> due to uncertainty regarding the progression and prognosis of their disease <sup>19</sup>.  
26  
27  
28  
29  
30  
31

### 32 33 *Helplessness, fear and vulnerability*

34  
35 The feeling of helplessness and loss of control in relation to the development of cardiac  
36  
37 disease symptoms both during pregnancy, birth and postpartum was expressed by one  
38  
39 woman as like "being caught in a spider web" <sup>28</sup>, or being trapped by their condition and  
40  
41 fearful about future pregnancies <sup>20</sup>. Another woman described being pregnant as a  
42  
43 "constant struggle between hope and helplessness" <sup>28</sup>. There was a mix of physical and  
44  
45 emotional symptoms when women described the suffering of their own illness and the  
46  
47 inability to take care of their newborn baby <sup>22 23</sup>.  
48  
49  
50  
51

52  
53 Women feared dying. They were deeply concerned that they would not survive the  
54  
55 pregnancy and that they would leave their child motherless, <sup>21 24 25</sup> or be left disabled and  
56  
57  
58  
59  
60

1  
2  
3 unable to care for their newborn<sup>24</sup>. They were worried about passing on heart disease to  
4  
5 their unborn baby<sup>18 24</sup>, giving birth to a baby with a heart abnormality,<sup>21 24</sup> and the effect  
6  
7 that medications might have on their baby<sup>21</sup>. These fears deeply affected women and some  
8  
9 continued to relive the distress brought on by the diagnosis of cardiac disease in pregnancy  
10  
11 through flashbacks, years after the birth of their child<sup>23</sup>.  
12  
13  
14  
15

### 16 17 **Self-care and risk awareness in pregnancy**

18  
19 Risk awareness and desire for motherhood were discussed in four of the papers<sup>18 24 25 27</sup>. In  
20  
21 a study by Andersen et al.<sup>18</sup> women with Long QT syndrome reported being frustrated not  
22  
23 to know how much danger to their health a pregnancy might impose. They felt that if they  
24  
25 took the risk to become pregnant, the decision was theirs.  
26  
27  
28  
29

30  
31 For another group of women with congenital heart disease, the determination to have a  
32  
33 child was so strong, that it outweighed self-care considerations. Despite being aware of the  
34  
35 complications during pregnancy, 10 of the 20 women in the study perceived their disease to  
36  
37 be less severe than that reported by their clinicians. These women therefore down played  
38  
39 the seriousness of their condition that was found to be related to a reliance on the care of  
40  
41 their health professionals, and a belief that medical and surgical care would result in a  
42  
43 successful pregnancy and birth outcome. This distorted view of their condition was also  
44  
45 linked to their quality of life which they felt was good<sup>24</sup>.  
46  
47  
48  
49  
50

### 51 52 **Social support for decision-making**

53  
54 A feeling of empowerment and hope provided through social support was clearly  
55  
56 demonstrated in several publications analysed in this study. Women using an online support  
57  
58  
59  
60

1  
2  
3 said, “It is beneficial to know that you are not alone”<sup>26</sup>, “friendly, open arms” that “gave me  
4  
5 hope”,<sup>26</sup> and “there is always hope”<sup>27</sup>. Some women shared the positive feeling of being  
6  
7 able to talk to someone who could understand them without judgment and to share  
8  
9 experiences. Women found peer-education to be an important part of managing their life  
10  
11 and living with heart failure<sup>26</sup>. Another woman described the distress of having to face her  
12  
13 pregnancy decision-making alone, as she lacked support from her family, who did not want  
14  
15 her to take any risks<sup>18</sup>.  
16  
17  
18  
19  
20

## 21 **Health care experiences**

### 22 *Health information needs*

23  
24  
25 Our study revealed gaps in the understanding of women’s health information knowledge or  
26  
27 needs by clinicians. Several women felt that they had received inadequate information from  
28  
29 clinicians. Only six of the participants in one study had information about contraception and  
30  
31 its relationship to their heart disease<sup>21</sup>. One woman stated that she was “shocked” that  
32  
33 none of her clinicians had discussed the severity of her condition with her: “I thought I was  
34  
35 completely fine. I didn’t know I wasn’t supposed to have any more kids”<sup>26</sup>. The need for  
36  
37 appropriate information delivery and counselling was highlighted by one woman who  
38  
39 recounted the time of extreme panic when her doctor delivered her diagnosis: “With no  
40  
41 family present, he told me that I might need a heart transplant and that I was finished being  
42  
43 pregnant”<sup>22</sup>.  
44  
45  
46  
47  
48  
49  
50

### 51 *Responsive care*

52  
53 Many women felt that they had received supportive care from their healthcare team, were  
54  
55 grateful and praised the skills and responsiveness of their clinicians. One woman expressed  
56  
57  
58  
59  
60

1  
2  
3 this by stating that the “world's elite team was there for me during the labour”<sup>23</sup>. Another  
4  
5 group of 13 women shared how grateful they were to the nurses who brought their  
6  
7 newborn babies to the intensive care unit where they were staying, and recognised the  
8  
9 separation concerns<sup>22</sup>. Women also reported feeling “secure” when provided with the  
10  
11 phone number of a cardiac nurse or cardiologist to call if they were worried or had  
12  
13 questions. Women valued check-ups as these gave them “hope”<sup>23</sup>. Women trusted their  
14  
15 clinicians and perceived them to be compassionate professionals who would carefully  
16  
17 monitor and support them throughout their pregnancy<sup>24</sup>.  
18  
19  
20  
21  
22

### 23 *Listening to women*

24  
25 Women commented on situations where clinicians had overly relied on the results of  
26  
27 objective tests and careful monitoring throughout their pregnancy to manage their  
28  
29 healthcare, rather than listening to them and taking their experiences and feelings into  
30  
31 consideration<sup>23</sup>. Some women reported that their voices were dismissed: “they didn’t seem  
32  
33 to care.”<sup>22</sup>, “they did not listen to me”, and “did not respect my wish.”<sup>23</sup>. As a result,  
34  
35 women felt ignored, or misjudged, which caused sadness, insecurity and disappointment in  
36  
37 the service provided by their healthcare professionals. Women expressed feeling rejected  
38  
39 by clinicians and felt that they were treated “like a drug addict, “like a pile of garbage”<sup>23</sup>,  
40  
41 “like a baby”<sup>21</sup>. One woman suggested that clinicians learn more about the symptoms of  
42  
43 their condition and take the complaints of their patients seriously<sup>26</sup>.  
44  
45  
46  
47  
48  
49  
50

### 51 *Healthcare facilities and professionals*

52  
53 There was a paucity of information in the literature regarding the healthcare centres and  
54  
55 the specialist skills of their providers to support the needs of women with heart diseases. In  
56  
57  
58  
59  
60



1  
2  
3 Australia, women with congenital heart disease were reported to have received care from  
4 cardiologists in a public tertiary hospital<sup>24</sup> and in private clinics<sup>25</sup>, in south eastern USA they  
5 received care at a large tertiary care centre<sup>21</sup>, and in Norway, they received care at a  
6 university hospital<sup>18</sup>. Women with congenital heart disease had also been recruited through  
7 an audit of records at a hospital department of paediatric and congenital cardiology in  
8 Belgium<sup>19</sup> and in another US study, by private paediatricians<sup>20</sup>. Women only referred to  
9 care they had received from both cardiologists and obstetricians in the Australian studies.  
10 Although women in the American and Norwegian studies referred generically to their  
11 “doctors” or “health providers” and nurses were noted in the paper from Belgium, less  
12 information was available regarding the health facilities and providers of women with other  
13 acquired heart disease from the US<sup>22 26 27</sup> and Sweden<sup>28 23</sup>. However, women in all studies,  
14 except in Hess et al.<sup>27</sup>, referred to cardiologists, obstetricians, nurses<sup>22 23</sup>, midwives<sup>28 23</sup> and  
15 emergency department staff<sup>27 23</sup> as their healthcare providers. It is difficult to draw  
16 conclusions from the findings of this study concerning the different healthcare experiences  
17 of women according to their providers and the facilities where they received care. While  
18 women with acquired heart disease were more likely to mention the care of cardiologists  
19 and obstetricians, as well as describe being listened to by their providers, such descriptions  
20 were not available in the corresponding papers that described women with congenital heart  
21 disease<sup>24 25</sup>.

## DISCUSSION

22 This paper reports the first meta-synthesis of qualitative research that investigated the  
23 experiences of pregnant women with a spectrum of cardiac disease. It provided insight into  
24 the continuum of preconception, pregnancy and parenting decision-making of these women

1  
2  
3 and provided evidence to inform new healthcare practices and communication for cardiac  
4  
5 care in women with heart disease. It detailed their struggles with gaining autonomy and  
6  
7 control over their decision-making, how presented challenges to self-care during pregnancy  
8  
9 and how impacted their daily lives. The level of autonomy and control was the most  
10  
11 prevalent theme that came across all cardiac conditions investigated reflecting the need for  
12  
13 women centred care.  
14  
15

16  
17  
18 Our approach did not enable pooling of results and comparison of data across studies.  
19  
20 However, our analysis explained how the studies were related, or dissonant, and compared  
21  
22 coding and themes (see Table 4). This enabled patterns to be discerned that could be  
23  
24 translated into cardiac disease in pregnancy and potentially other rare and chronic diseases  
25  
26 in pregnancy. It is possible that our thematic analysis may have led to a loss of detail,  
27  
28 particularly in relation to the unique contexts of women lives; however, efforts were made  
29  
30 to maintain this in the descriptive part of the analysis to retain the integrity of the original  
31  
32 studies. The exclusion of non-English papers may have resulted in an incomplete retrieval of  
33  
34 research studies.  
35  
36  
37  
38  
39  
40  
41

### 42 **Women's autonomy and control**

43  
44 In five of the studies in our meta-synthesis, women identified a lack of understanding of,  
45  
46 and attention to their existing knowledge by clinicians, as well as their self-reported health  
47  
48 status and health needs as barriers to satisfactory care<sup>21-23 26 27</sup>. While suggestions were  
49  
50 made about how shared decision-making could be implemented into cardiovascular care<sup>29</sup>  
51  
52  
53<sup>30</sup>, and translated into practice in to national programs such as the Million Hearts®  
54  
55  
56  
57  
58  
59  
60

1  
2  
3 initiative<sup>31 32</sup>, a gendered approach was not considered, nor examined in the unique context  
4  
5 of various cardiac conditions in pregnancy.  
6  
7

8  
9  
10 Clinicians could be better supported to facilitate a woman's active role in decision-making at  
11  
12 the point of care by using tailored tools, particularly where a woman's self-care may be  
13  
14 affected by downplaying their cardiac disease as found in two studies in the meta-synthesis  
15  
16 <sup>24 25</sup>. In these cases, gendered tools that incorporate collaborative deliberation <sup>33</sup> or  
17  
18 conversations between women and clinicians, could have been useful.  
19  
20

21  
22  
23 The Elwyn et al. 2013 "Talk model"<sup>34</sup> provides a useful conceptual framework for shared  
24  
25 decision-making that enables measurement across four components to facilitate effective  
26  
27 communication and its on-going evaluation between a women and her clinician. However,  
28  
29 women also have a responsibility to contribute to charting a clear path through decision-  
30  
31 making by identifying barriers and solutions to their implementation <sup>35</sup>. Even though the  
32  
33 Elwyn Talk Model provides a practical way forward for clinicians and women, it does not  
34  
35 consider the steps or processes required for implementation including buy-in at the  
36  
37 individual clinician and practice level through guidelines and consensus statements,  
38  
39 integration into the workflow and evaluation,<sup>29</sup> particularly in the context of cardiac disease  
40  
41 in pregnancy <sup>12</sup>.  
42  
43  
44  
45  
46  
47

48  
49 Although the voices of pregnant women with genetic conditions and/or from low, lower-  
50  
51 middle and upper-middle income high-income countries as per the World Bank Atlas  
52  
53 definition<sup>36</sup>, were absent from the literature it is likely that they too would struggle to gain  
54  
55  
56  
57  
58  
59

1  
2  
3 autonomy and control over their decision-making and to manage their fears and  
4  
5 vulnerabilities for all cardiac conditions.  
6  
7

### 8 9 **Self-care and risk awareness in pregnancy**

10  
11 Consistent with previously published reports<sup>37-40</sup>, our study revealed little insight into pre-  
12  
13 conception counselling and the advice clinicians provided concerning contraception for  
14  
15 women with existing cardiac disease or after a pregnancy, when cardiac disease was  
16  
17 diagnosed. In one study, less than 50% of women with cardiac disease had received any  
18  
19 counselling<sup>39</sup>. We found that the timing of a woman's diagnosis of cardiac disease and  
20  
21 hence her experience, was different depending on the type of heart condition. Most of  
22  
23 those with congenital heart disease would have been expected to have knowledge of their  
24  
25 conditions, and ideally would have had pre-conception counselling. However, for those with  
26  
27 peripartum cardiomyopathy, the diagnosis may have occurred late in pregnancy, meaning  
28  
29 that some women would have entered pregnancy without cardiac disease and experienced  
30  
31 a very different pregnancy until diagnosed. However, many women with peripartum  
32  
33 cardiomyopathy present post-partum<sup>41</sup> and therefore these women's counselling needs  
34  
35 would take into consideration subsequent pregnancies.  
36  
37  
38  
39  
40  
41  
42  
43

44 Miner et al 2004 emphasised the importance of including contraceptive counselling early in  
45  
46 adolescence on an "on-going basis"<sup>38</sup>. Furthermore, the American Heart Association and  
47  
48 others provide recommendations regarding prenatal counselling for women and their  
49  
50 families with heart disease, as well as counselling in relation to the expectant child that  
51  
52 takes into consideration feeding and growth issues, quality of life and long-term care, family  
53  
54 stressors, and foetal cardiac interventions<sup>12 42</sup>.  
55  
56  
57  
58  
59  
60

### **Social support for decision-making**

The health benefits of social support for pregnant women from their partner, family, friends and those who have experienced similar circumstances are well known<sup>43</sup> and a significant predictor of health-related quality of life. Other authors have highlighted the importance of peer mentoring for pregnant women with defined health needs to allay fear and anxiety, particularly for women with spinal cord injuries<sup>44 45</sup> and patients with cardiovascular disease<sup>46</sup>. Women in two papers in our study<sup>26 27</sup> found that on-line blogs related to their disease were helpful. Other studies found on-line forums to be supportive for other pregnant women with rare or life-threatening conditions in pregnancy<sup>47</sup>.

### **Health care experiences**

Decision-making tools for healthcare can increase patient participation and improve accurate risk perceptions<sup>48 49</sup>. For women with heart disease, our recommendation is that women should be engaged in the design of these decision-making tools in consultation with healthcare providers and that an effective communications strategy is implemented that links the opinions of cardiologists, obstetricians, maternal foetal medicine specialists, obstetric physicians and anaesthetists, intensivists, midwives and cardiac nurses<sup>50</sup> to optimise patient care. This strategy would provide a comprehensive support tool that would console women, allay their fears, and build their confidence and resilience through coping and self-care strategies. Supporting this approach is a data from a study by Patel et al 2016 who reported that effective communication led to responsive and tailored care in women who received high-quality care from teams of health professionals<sup>23</sup>.

1  
2  
3 The American Heart Association emphasises the importance of measuring the self-reported  
4 health status (i.e. symptom burden, functional status, and health-related quality of life) of  
5 patients with cardiac disease as it is not only a necessary component of clinical risk scoring,  
6 but consistent with a holistic view of health and the goals of patient centred care <sup>51</sup>.  
7  
8  
9  
10  
11  
12  
13

## 14 **Conclusion**

15  
16 Our meta-synthesis revealed that there is a need for tailored, responsive care and gendered  
17 models to guide shared decision-making and empathetic counselling across the  
18 reproductive lifespan for women with cardiac disease. Our findings were consistent with the  
19 experiences of women with other non-communicable diseases in pregnancy, such as chronic  
20 kidney disease and diabetes <sup>52 53</sup> and similar to studies of non-pregnant women with cardiac  
21 disease <sup>54 55</sup>. Our study identified opportunities to improve shared decision-making whereby  
22 clinicians understand the social context (her family, employment and other responsibilities)  
23 of women and their goals, values, and preferences for health. Shared decision-making can  
24 facilitate effective communication between a woman and her clinician to develop a shared  
25 understanding of the problem and generate a mutually acceptable evaluation and  
26 management plan.  
27  
28  
29  
30  
31  
32  
33  
34  
35  
36  
37  
38  
39  
40  
41  
42  
43  
44  
45  
46  
47  
48  
49  
50  
51  
52  
53  
54  
55  
56  
57  
58  
59  
60

## REFERENCES

1. Creanga AA, Syverson C, Seed K, et al. Pregnancy-Related Mortality in the United States, 2011–2013. *Obstetrics and Gynecology* 2017;130(2):366-73. doi: 10.1097/AOG.0000000000002114
2. Centre for Maternal and Child Enquiries. Saving Mothers' Lives: reviewing maternal deaths to make motherhood safer-2006-2008. The Eighth Report on Confidential Enquiries into Maternal Deaths in the United Kingdom. *BJOG* 2011;118(Suppl. 1):1-203. doi: 10.1111/j.1471-0528.2010.02847.x
3. Humphrey MD, Bonello M, Chughtai A, et al. Maternal deaths in Australia 2008-2012. Canberra: Australian Institute of Health and Welfare 2015.
4. Sullivan EA, King JF. Maternal deaths in Australia 2000-2002. Maternal Deaths Sydney: Australian Institute of Health and Welfare, National Perinatal Statistics Unit 2006.
5. Cliffe S, Black D, Bryant J, et al. Maternal deaths in New South Wales, Australia: a data linkage project. *Australian and New Zealand Journal of Obstetrics and Gynaecology* 2008;48(3):255-60. doi: 10.1111/j.1479-828X.2008.00878.x
6. Roos-Hesselink JW, Ruys TP, Stein JJ, et al. Outcome of pregnancy in patients with structural or ischaemic heart disease: results of a registry of the European Society of Cardiology. *European Heart Journal* 2013;34(9):657-65. doi: 10.1093/eurheartj/ehs270
7. RCOG. Cardiac Disease and Pregnancy. Good Practice. London: Royal College of Obstetricians and Gynaecologists, 2011.
8. Roberts WT, Adamson D. Cardiovascular disease in pregnancy. *Obstetrics, Gynaecology and Reproductive Medicine* 2013;23(7):195-201. doi: 10.1016/j.ogrm.2013.06.003
9. Moons P, Bovijn L, Budts W, et al. Temporal Trends in Survival to Adulthood Among Patients Born With Congenital Heart Disease From 1970 to 1992 in Belgium: A Clinical Perspective. *Circulation* 2010;122(22):2264-72. doi: 10.1161/CIRCULATIONAHA.110.946343
10. Chor J, Rankin K, Harwood B, et al. Unintended pregnancy and postpartum contraceptive use in women with and without chronic medical disease who experienced a live birth. *Contraception* 2011;84(1):57-63. doi: 10.1016/j.contraception.2010.11.018
11. Lindley KJ, Madden T, Cahill AG, et al. Contraceptive use and unintended pregnancy in women with congenital heart disease. *Obstetrics & Gynecology* 2015;126(2):363-69. doi: 10.1097/AOG.0000000000000911
12. Canobbio MM, Warnes CA, Aboulhosn J, et al. Management of pregnancy in patients with complex congenital heart disease: a scientific statement for healthcare professionals from the American Heart Association *Circulation* 2017;135(8):e50-e87 doi: 10.1161/CIR.0000000000000458
13. RCOG. Cardiac Disease and Pregnancy Good Practice No. 13 <https://www.rcog.org.uk/globalassets/documents/guidelines/goodpractice13cardiacdiseaseandpregnancy.pdf>. London: Royal College of Obstetricians and Gynaecologists, 2011.
14. Regitz-Zagrosek V, Blomstrom Lundqvist C, Borghi C, et al. ESC Guidelines on the management of cardiovascular diseases during pregnancy. *European Heart Journal* 2011;32:3147-97 doi:10.1093/eurheartj/ehr218.
15. Thomas J, Harden A. Methods for the thematic synthesis of qualitative research in systematic reviews. *BMC Medical Research Methodology* 2008;8(1):45. doi: 10.1186/1471-2288-8-45
16. NHS. Critical Appraisal Skills Programme (CASP) making sense of evidence 10 questions to help you make sense of qualitative research London: Public Health Resource Unit; 2006 [Available from: <http://www.casp-uk.net/casp-tools-checklists> accessed 12 June 2017.
17. Thomas DR. A general inductive approach for analyzing qualitative evaluation data. *American Journal of Evaluation* 2006;27(2):237-46. doi: 10.1177/1098214005283748

18. Andersen J, Øyen N, Bjorvatn C, et al. Living with long QT syndrome: A qualitative study of coping with increased risk of sudden cardiac death. *Journal of Genetic Counseling* 2008;17(5):489-98. doi: 10.1007/s10897-008-9167-y
19. Claessens P, Moons P, de Casterlé BD, et al. What Does it Mean to Live with a Congenital Heart Disease? A Qualitative Study on the Lived Experiences of Adult Patients. *European Journal of Cardiovascular Nursing* 2005;4(1):3-10. doi: 10.1016/j.ejcnurse.2004.12.003
20. Gantt L. As normal a life as possible: mothers and their daughters with congenital heart disease. *Health Care for Women International* 2002;23(5):481-91. doi: 10.1080/073993302760190083
21. Gantt LT. Growing up heartsick: the experiences of young women with congenital heart disease. *Health Care for Women International* 1992;13(3):241-48. doi: 10.1080/07399339209515999
22. Dekker RL, Morton CH, Singleton P, et al. Women's Experiences Being Diagnosed With Peripartum Cardiomyopathy: A Qualitative Study. *Journal of Midwifery and Women's Health* 2016;61(4):467-73. doi: 10.1111/jmwh.12448
23. Patel H, Schaufelberger M, Begleya C, et al. Experiences of health care in women with Peripartum Cardiomyopathy in Sweden: a qualitative interview study. *BMC Pregnancy and Childbirth* 2016;16(383) doi: 10.1186/s12884-016-1178-3
24. Ngu K, Hay M, Menahem S. Case Studies of the Perceptions of Women with High Risk Congenital Heart Disease Successfully Completing a Pregnancy. *Heart, Lung and Circulation* 2014;23(9):811-17. doi: 10.1016/j.hlc.2014.03.019
25. Ngu K, Hay M, Menahem S. Perceptions and motivations of an Australian cohort of women with or without congenital heart disease proceeding to pregnancy. *International Journal of Gynecology and Obstetrics* 2014;126(3):252-55. doi: 10.1016/j.ijgo.2014.03.032
26. Hess RF, Weinland JA, Beebe K. "I Am Not Alone": A Survey of Women With Peripartum Cardiomyopathy and Their Participation in an Online Support Group. *CIN: Computers, Informatics, Nursing* 2010;28(4):215-21. doi: 10.1097/NCN.0b013e3181e1e28f
27. Hess RF, Weinland JAD. The life-changing impact of peripartum cardiomyopathy: an analysis of online postings. *MCN: The American Journal of Maternal Child Nursing* 2012;37(4):241-46. doi: 10.1097/NMC.0b013e31824b52ed
28. Patel H, Berg M, Barasa A, et al. Symptoms in women with Peripartum Cardiomyopathy: A mixed method study. *Midwifery* 2016;32:14-20. doi: 10.1016/j.midw.2015.10.001
29. Hess EP, Coylewright M, Frosch DL, et al. Implementation of Shared Decision Making in Cardiovascular Care. *Circulation: Cardiovascular Quality and Outcomes* 2014;7(5):797-803. doi: 10.1161/CIRCOUTCOMES.113.000351
30. Ting HH, Brito JP, Montori VM. Shared Decision Making. *Circulation: Cardiovascular Quality and Outcomes* 2014;7(2):323-27. doi: 10.1161/circoutcomes.113.000288
31. Lloyd-Jones DM, Huffman MD, Karmali KN, et al. Estimating longitudinal risks and benefits from cardiovascular preventive therapies among medicare patients: The Million Hearts longitudinal ASCVD risk assessment tool. *Circulation* 2016;135(13):e793-e813. doi: 10.1161/CIR.0000000000000467
32. CMS. Million Hearts®: Cardiovascular Disease Risk Reduction Model Baltimore: U.S. Centers for Medicare & Medicaid Services; 2017 [Available from: <https://innovation.cms.gov/initiatives/Million-Hearts-CVDRRM/> accessed 26 July 2017.
33. Elwyn G, Frosch D, Volandes AE, et al. Investing in deliberation: a definition and classification of decision support interventions for people facing difficult health decisions. *Medical Decision Making* 2010;30(6):701-11. doi: 10.1177/0272989X10386231
34. Elwyn G, Tsulukidze M, Edwards A, et al. Using a 'talk' model of shared decision making to propose an observation-based measure: Observer OPTION 5 Item. *Patient Education and Counseling* 2013;93(2):265-71. doi: 10.1016/j.pec.2013.08.005
35. AHA. Overcoming Barriers to Shared Decision Making: American Heart Association; 2017 [Available from: <http://www.heart.org/HEARTORG/Conditions/HeartFailure/Overcoming->



- 1  
2  
3 [Barriers-to-Shared-Decision-Making\\_UCM\\_441939\\_Article.jsp#.WacypdFLdnl](#) accessed 26  
4 July 2017.
- 5 36. World Bank. The World Bank Atlas method - detailed methodology: World Bank; 2016 [Available  
6 from: [https://datahelpdesk.worldbank.org/knowledgebase/articles/378832-what-is-the-](https://datahelpdesk.worldbank.org/knowledgebase/articles/378832-what-is-the-world-bank-atlas-method)  
7 [world-bank-atlas-method](https://datahelpdesk.worldbank.org/knowledgebase/articles/378832-what-is-the-world-bank-atlas-method) accessed 23 June 2018.
- 8 37. Kovacs AH, Harrison JL, Colman JM, et al. Pregnancy and contraception in congenital heart  
9 disease: what women are not told. *Journal of the American College of Cardiology*  
10 2008;52(7):577-78. doi: 10.1016/j.jacc.2008.05.013
- 11 38. Miner PD. Contraceptive choices for females with congenital heart disease. *Progress in Pediatric*  
12 *cardiology* 2004;19(1):15-24. doi: 10.1016/j.ppedcard.2003.01.021
- 13 39. Vigl M, Kaemmerer M, Seifert-Klauss V, et al. Contraception in women with congenital heart  
14 disease. *The American Journal of Cardiology* 2010;106(9):1317-21. doi:  
15 10.1016/j.amjcard.2010.06.060
- 16 40. Chor J, Oswald L, Briller J, et al. Reproductive health experiences of women with cardiovascular  
17 disease. *Contraception* 2012;86(5):464-69. doi: 10.1016/j.contraception.2012.02.013
- 18 41. Elkayam U. Clinical Characteristics of Peripartum Cardiomyopathy in the United States: Diagnosis,  
19 Prognosis, and Management. *Journal of the American College of Cardiology* 2011;58(7):659-  
20 70. doi: 10.1016/j.jacc.2011.03.047
- 21 42. Lafranchi T, Lincoln P. Prenatal Counseling and Care for Single-Ventricle Heart Disease: One  
22 Center's Model for Care. *Critical Care Nurse* 2015;35(5):53-61. doi: 10.4037/ccn2015247
- 23 43. Emmanuel E, St John W, Sun J. Relationship between social support and quality of life in  
24 childbearing women during the perinatal period. *Journal of Obstetric, Gynecologic, and*  
25 *Neonatal Nursing* 2012;41(6):E62-E70. doi: 10.1111/j.1552-6909.2012.01400
- 26 44. Bertschy S, Geyh S, Pannek J, et al. Perceived needs and experiences with healthcare services of  
27 women with spinal cord injury during pregnancy and childbirth—a qualitative content  
28 analysis of focus groups and individual interviews. *BMC Health Services Research*  
29 2015;15(1):234. doi: 10.1186/s12913-015-0878-0
- 30 45. Tebbet M, Kennedy P. The experience of childbirth for women with spinal cord injuries: An  
31 interpretative phenomenology analysis study. *Disability and Rehabilitation* 2012;34(9):762-  
32 69. doi: 10.3109/09638288.2011.619619
- 33 46. Medina E, Mesquita C. Healthcare social networks for patients with cardiovascular diseases and  
34 recommendation systems. *International Journal of Cardiovascular Sciences* 2016;29(1):80-  
35 85. doi: 10.5935/2359-4802.20160005
- 36 47. Lowe P, Powell J, Griffiths F, et al. "Making it all normal": the role of the internet in problematic  
37 pregnancy. *Qualitative Health Research* 2009;19(10):1476-84. doi:  
38 10.1177/1049732309348368
- 39 48. Stacey D, Bennett CL, Barry MJ, et al. Decision aids for people facing health treatment or  
40 screening decisions. *Cochrane Database Syst Rev* 2011;10(10) doi:  
41 10.1002/14651858.CD001431.pub2.
- 42 49. Coylewright M, Branda M, Inselman JW, et al. Impact of sociodemographic patient characteristics  
43 on the efficacy of decision aids. *Circulation: Cardiovascular Quality and Outcomes*  
44 2014;7(3):360-67. doi: 10.1161/HCQ.0000000000000006
- 45 50. Hjelmfors A, Stromberg A, Friedrichsen M, et al. Using co-design to develop communication  
46 interventions in heart failure care. *European Journal of Cardiovascular Nursing* 2016;15:S19-  
47 S20. doi: 10.1177/1474515116634263
- 48 51. Rumsfeld JS, Alexander KP, Goff DC, et al. Cardiovascular health: the importance of measuring  
49 patient-reported health status. *Circulation* 2013;127(22):2233-49. doi:  
50 10.1161/CIR.0b013e3182949a2e
- 51 52. Tong A, Jesudason S, Craig JC, et al. Perspectives on pregnancy in women with chronic kidney  
52 disease: systematic review of qualitative studies. *Nephrology Dialysis Transplantation*  
53 2015;30(4):652-61. doi: 10.1093/ndt/gfu378
- 54  
55  
56  
57  
58  
59  
60

- 1  
2  
3 53. McCorry NK, Hughes C, Spence D, et al. Pregnancy planning and diabetes: a qualitative  
4 exploration of women's attitudes toward preconception care. *Journal of Midwifery and*  
5 *Women's Health* 2012;57(4):396-402. doi: 10.1111/j.1542-2011.2011.00143.x  
6 54. Emslie C. Women, men and coronary heart disease: a review of the qualitative literature. *Journal*  
7 *of Advanced Nursing* 2005;51(4):382-95. doi: 10.1111/j.1365-2648.2005.03509.x  
8 55. Lockyer L. Women's interpretation of their coronary heart disease symptoms. *European Journal*  
9 *of Cardiovascular Nursing* 2005;4(1):29-35. doi: 10.1016/j.ejcnurse.2004.09.003  
10  
11  
12  
13  
14  
15  
16  
17  
18  
19  
20  
21  
22  
23  
24  
25  
26  
27  
28  
29  
30  
31  
32  
33  
34  
35  
36  
37  
38  
39  
40  
41  
42  
43  
44  
45  
46  
47  
48  
49  
50  
51  
52  
53  
54  
55  
56  
57  
58  
59  
60

**Acknowledgments**

The authors would like to thank Sabina Belli for editing this paper.

**Sources of Funding**

This study was unfunded.

**Conflict of interest**

None

**Author contributions**

The study was conceived by ES. AJD designed the study. YK undertook the literature search and screening with assistance from AJD. YK, AJD and ES critically appraised the papers. YK and AJD undertook the initial analysis with input from all authors (ES, KL, MP and WAP). AJD wrote the manuscript, all authors edited and approved the final manuscript.

**Data sharing statement**

All data used in this meta-synthesis is available in the public domain.

1  
2  
3  
4  
5  
6  
7  
8  
9  
10  
11  
12  
13  
14  
15  
16  
17  
18  
19  
20  
21  
22  
23  
24  
25  
26  
27  
28  
29  
30  
31  
32  
33  
34  
35  
36  
37  
38  
39  
40  
41  
42  
43  
44  
45  
46  
47  
48  
49  
50  
51  
52  
53  
54  
55  
56  
57  
58  
59  
60

For peer review only

1  
2  
3  
4  
5  
6  
7  
8  
9  
10  
11  
12  
13  
14  
15  
16  
17  
18  
19  
20  
21  
22  
23  
24  
25  
26  
27  
28  
29  
30  
31  
32  
33  
34  
35  
36  
37  
38  
39  
40  
41  
42  
43  
44  
45  
46  
47  
48  
49  
50  
51  
52  
53  
54  
55  
56  
57  
58  
59  
60

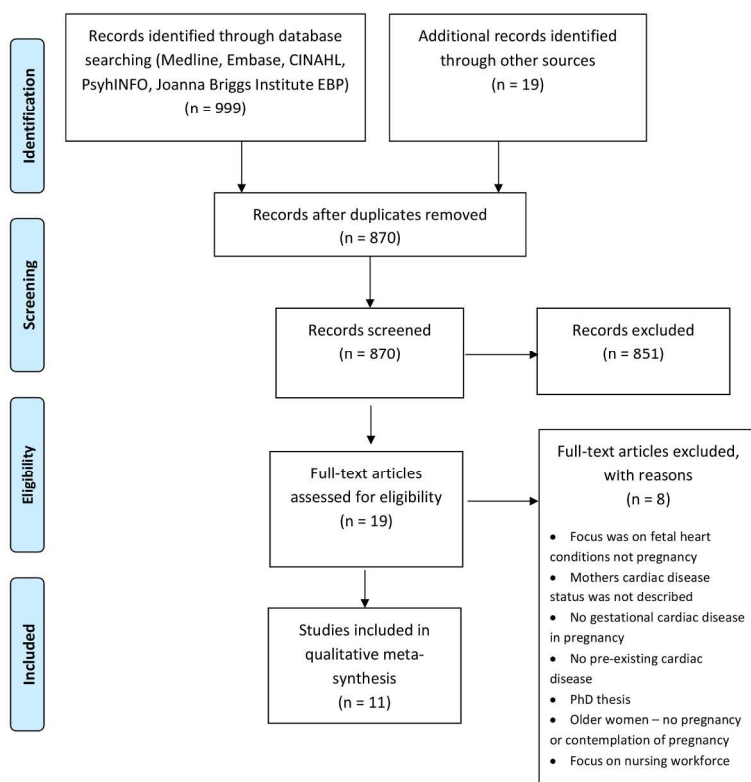

Figure1. PRISMA Flowchart of Cardiac Disease in Pregnancy

Figure1. PRISMA Flowchart of Cardiac Disease in Pregnancy

209x296mm (240 x 240 DPI)

## Supplementary data-

## Appendix 1: Full search strategy

| Bibliographic Database                             | Search strategy                                                                                                                                                                                                                                                                                                                                                                                                                                                                                                                                                                                                                                                                                                                                                                                                                                                                                                                                                                                                                                                                                                                                                                                                                                                                                                                                                                                                                                                                                                                                                                                                                                                                                                                                                                                                                                                                                                                                                                                                                                                                                                                                                                           |
|----------------------------------------------------|-------------------------------------------------------------------------------------------------------------------------------------------------------------------------------------------------------------------------------------------------------------------------------------------------------------------------------------------------------------------------------------------------------------------------------------------------------------------------------------------------------------------------------------------------------------------------------------------------------------------------------------------------------------------------------------------------------------------------------------------------------------------------------------------------------------------------------------------------------------------------------------------------------------------------------------------------------------------------------------------------------------------------------------------------------------------------------------------------------------------------------------------------------------------------------------------------------------------------------------------------------------------------------------------------------------------------------------------------------------------------------------------------------------------------------------------------------------------------------------------------------------------------------------------------------------------------------------------------------------------------------------------------------------------------------------------------------------------------------------------------------------------------------------------------------------------------------------------------------------------------------------------------------------------------------------------------------------------------------------------------------------------------------------------------------------------------------------------------------------------------------------------------------------------------------------------|
| <b>MEDLINE</b><br><br><b>1996 – 6 October 2016</b> | <ol style="list-style-type: none"> <li>1 Cardiac disease.mp. or Heart Diseases</li> <li>2 Postoperative Complications/ or Heart Transplantation/ or heart transplant.mp. or Heart Failure</li> <li>3 Rheumatic heart disease.mp. or Rheumatic Heart Disease</li> <li>4 Adult/ or Hypertension, Pulmonary/ or Heart Defects, Congenital/ or congenital heart disease.mp. or Cardiac Surgical Procedures/</li> <li>5 Hypertension/ or Cardiomyopathies/ or Cardiovascular Diseases/ or Arrhythmias, Cardiac/ or Heart Defects, Congenital/ or Heart Diseases/ or Cardiomyopathy, Hypertrophic/ or genetic cardiac disease.mp.</li> <li>6 Arrhythmias, Cardiac/ or Myocardial Infarction/ or Atrial Fibrillation/ or chronic arrhythmia.mp. or Tachycardia, Supraventricular/ or Coronary Disease/</li> <li>7 1 or 2 or 3 or 4 or 5 or 6</li> <li>8 Pregnancy Complications, Hematologic/ or Pregnancy, Unplanned/ or Pregnancy Maintenance/ or Pregnancy, High-Risk/ or Pregnancy, Unwanted/ or Pregnancy in Adolescence/ or Pregnancy, Multiple/ or Pregnancy Outcome/ or Pregnancy Complications/ or Pregnancy/ or Hypertension, Pregnancy-Induced/ or pregnancy.mp. or Pregnancy in Diabetics/ or Pregnancy, Abdominal/ or Pregnancy Complications, Cardiovascular/</li> <li>9 Pregnant women.mp. or Pregnant Women/</li> <li>10 Infant Mortality/ or Pregnancy/ or Maternal Health Services/ or Prenatal Care/ or Pregnancy Complications/ or antenatal care.mp. or Socioeconomic Factors/</li> <li>11 Perinatal care.mp. or Perinatal Care/</li> <li>12 birth.mp. or Parturition/</li> <li>13 postpartum.mp. or Postpartum Period</li> <li>14 8 or 9 or 10 or 11 or 12 or 13</li> <li>15 Decision making.mp. or Decision Making/</li> <li>16 Shared decision making.mp.</li> <li>17 "Delivery of Health Care"/ or Decision Making/ or Physician-Patient Relations/ or Patient-Centered Care/ or patient centered care.mp.</li> <li>18 15 or 16 or 17</li> <li>19 midwives.mp. or Midwifery/</li> <li>20 General practitioner.mp. or General Practitioners/</li> <li>21 Primary physician.mp.</li> <li>22 Obstetrics/ or obstetrician.mp. or Practice Patterns, Physicians'/</li> </ol> |

|                                                                      |                                                                                                                                                                                                                                                                                                                                                                                                                                                                                                                                                                                                                                                                                                                                                                                                                                                                                                                                                                                                                                                                                                                                                                                                                                                                                                                                                                                                                   |
|----------------------------------------------------------------------|-------------------------------------------------------------------------------------------------------------------------------------------------------------------------------------------------------------------------------------------------------------------------------------------------------------------------------------------------------------------------------------------------------------------------------------------------------------------------------------------------------------------------------------------------------------------------------------------------------------------------------------------------------------------------------------------------------------------------------------------------------------------------------------------------------------------------------------------------------------------------------------------------------------------------------------------------------------------------------------------------------------------------------------------------------------------------------------------------------------------------------------------------------------------------------------------------------------------------------------------------------------------------------------------------------------------------------------------------------------------------------------------------------------------|
|                                                                      | <p>23 cardiologist.mp.<br/> 24 Family Practice/ or Allied Health Personnel/ or allied health professional.mp.<br/> 25 19 or 20 or 21 or 22 or 23 or 24<br/> 26 7 and 14 and 18 and 25</p>                                                                                                                                                                                                                                                                                                                                                                                                                                                                                                                                                                                                                                                                                                                                                                                                                                                                                                                                                                                                                                                                                                                                                                                                                         |
| <p><b>EMBASE:</b><br/><br/> <b>1996 - 6 October 2016</b></p>         | <p>1 cardiac disease.mp.<br/> 2 rheumatic heart disease.mp. or rheumatic heart disease/<br/> 3 congenital heart disease.mp. orexp congenital heart disease/<br/> 4 Arrhythmias.mp. or heart arrhythmia/<br/> 5 1 and 2 and 3 and 4<br/> 6 pregnant women.mp. or pregnant woman/<br/> 7 pregnancy Complications.mp. or pregnancy complication/<br/> 8 infant Mortality.mp. or infant mortality/<br/> 9 perinatal care.mp. or perinatal care/<br/> 10 birth/<br/> 11 postpartum pain/ or postpartum hemorrhage/ or postpartum.mp.<br/> 12 6 and 7 and 8 and 9 and 10 and 11<br/> 13 decision making.mp. or decision making/<br/> 14 medical decision making/ or doctor patient relation/ or decision making/ or patient participation/ or informed consent/ or shared decision making.mp. or interpersonal communication/<br/> 15 13 and 14<br/> 16 midwives.mp. or midwife/<br/> 17 general practitioner.mp. or general practitioner/<br/> 18 general practitioner/ or primary health care/ or general practice/ or primary physician.mp.<br/> 19 obstetrics/ or obstetrician/ or pregnancy/ or pregnancy complication/<br/> 20 cardiologist/ or heart disease/<br/> 21 family Practice.mp. or general practice/<br/> 22 16 and 17 and 18 and 19 and 20<br/> 23 21 and 22<br/> 24 5 and 12 and 15 and 23<br/> 25 limit 24 to ("qualitative (maximizes sensitivity)" and English and article and last 20 years)</p> |
| <p><b>CINAHL (EBSCO)</b><br/><br/> <b>1995 - 11 October 2016</b></p> | <p>S1" cardiac disease "<br/> S2 (MH "pregnancy") OR "pregnancy"<br/> S3 MH "decision making, patient") OR (MH "patient centered care") OR ""wom?n cent* care" OR "patient cent* care" OR "wom?n* experience" OR "shared decision making""<br/> S4 S1 AND S2 AND S3</p>                                                                                                                                                                                                                                                                                                                                                                                                                                                                                                                                                                                                                                                                                                                                                                                                                                                                                                                                                                                                                                                                                                                                           |
| <p><b>PsycINFO (EBSCO)</b></p>                                       | <p>1. cardiac disease</p>                                                                                                                                                                                                                                                                                                                                                                                                                                                                                                                                                                                                                                                                                                                                                                                                                                                                                                                                                                                                                                                                                                                                                                                                                                                                                                                                                                                         |

1  
2  
3  
4  
5  
6  
7  
8  
9  
10  
11  
12  
13  
14  
15  
16  
17  
18  
19  
20  
21  
22  
23  
24  
25  
26  
27  
28  
29  
30  
31  
32  
33  
34  
35  
36  
37  
38  
39  
40  
41  
42  
43  
44  
45  
46  
47  
48  
49  
50  
51  
52  
53  
54  
55  
56  
57  
58  
59  
60

|                               |                                                                                                                                                                                                                                                                                          |
|-------------------------------|------------------------------------------------------------------------------------------------------------------------------------------------------------------------------------------------------------------------------------------------------------------------------------------|
| <b>1984 - 18 October 2016</b> | <ol style="list-style-type: none"><li>2. MH "Pregnancy") OR "pregnancy"</li><li>3. (MH "Decision Making, Patient") OR (MH "Patient Centered Care") OR ""wom?n cent* care" OR "patient cent* care" OR "wom?n* experience" OR "shared decision making""</li><li>4. 1 AND 2 AND 3</li></ol> |
|-------------------------------|------------------------------------------------------------------------------------------------------------------------------------------------------------------------------------------------------------------------------------------------------------------------------------------|



For peer review only



| Section/topic                                                                                                                             | # | Checklist item                                                                                                                                                                                                                                                                                              | Reported on page # |
|-------------------------------------------------------------------------------------------------------------------------------------------|---|-------------------------------------------------------------------------------------------------------------------------------------------------------------------------------------------------------------------------------------------------------------------------------------------------------------|--------------------|
| <b>TITLE</b>                                                                                                                              |   |                                                                                                                                                                                                                                                                                                             |                    |
| A qualitative meta-synthesis review of the experiences of women with cardiac disease who have been, are pregnant or considering pregnancy | 1 | Identify the report as a systematic review, meta-analysis, or both. – <b>meta-synthesis</b>                                                                                                                                                                                                                 | 1                  |
| <b>ABSTRACT</b>                                                                                                                           |   |                                                                                                                                                                                                                                                                                                             |                    |
| Structured summary                                                                                                                        | 2 | Provide a structured summary including, as applicable: background; objectives; data sources; study eligibility criteria, participants, and interventions; study appraisal and synthesis methods; results; limitations; conclusions and implications of key findings; systematic review registration number. | 3-4                |
| <b>INTRODUCTION</b>                                                                                                                       |   |                                                                                                                                                                                                                                                                                                             |                    |
| Rationale                                                                                                                                 | 3 | Describe the rationale for the review in the context of what is already known.                                                                                                                                                                                                                              | 5-6                |
| Objectives                                                                                                                                | 4 | Provide an explicit statement of questions being addressed with reference to participants, interventions, comparisons, outcomes, and study design (PICOS).                                                                                                                                                  | 6                  |
| <b>METHODS</b>                                                                                                                            |   |                                                                                                                                                                                                                                                                                                             |                    |
| Protocol and registration                                                                                                                 | 5 | Indicate if a review protocol exists, if and where it can be accessed (e.g., Web address), and, if available, provide registration information including registration number. – <b>N/A</b>                                                                                                                  |                    |
| Eligibility criteria                                                                                                                      | 6 | Specify study characteristics (e.g., PICOS, length of follow-up) and report characteristics (e.g., years considered, language, publication status) used as criteria for eligibility, giving rationale.                                                                                                      | 7                  |
| Information sources                                                                                                                       | 7 | Describe all information sources (e.g., databases with dates of coverage, contact with study authors to identify additional studies) in the search and date last searched.                                                                                                                                  | 7                  |
| Search                                                                                                                                    | 8 | Present full electronic search strategy for at least one database, including any limits used, such that it could be repeated. – <b>Appendix 1.</b>                                                                                                                                                          | 32-34              |
| Study selection                                                                                                                           | 9 | State the process for selecting studies (i.e., screening, eligibility, included in systematic review, and, if applicable, included in the meta-analysis).                                                                                                                                                   | 8-9                |

|                                    |    |                                                                                                                                                                                                                        |           |
|------------------------------------|----|------------------------------------------------------------------------------------------------------------------------------------------------------------------------------------------------------------------------|-----------|
| Data collection process            | 10 | Describe method of data extraction from reports (e.g., piloted forms, independently, in duplicate) and any processes for obtaining and confirming data from investigators.                                             | 8-9       |
| Data items                         | 11 | List and define all variables for which data were sought (e.g., PICOS, funding sources) and any assumptions and simplifications made.                                                                                  |           |
| Risk of bias in individual studies | 12 | Describe methods used for assessing risk of bias of individual studies (including specification of whether this was done at the study or outcome level), and how this information is to be used in any data synthesis. | 9         |
| Summary measures                   | 13 | State the principal summary measures (e.g., risk ratio, difference in means).                                                                                                                                          | 9         |
| Synthesis of results               | 14 | Describe the methods of handling data and combining results of studies, if done, including measures of consistency (e.g., $I^2$ ) for each meta-analysis.                                                              | 9         |
| Risk of bias across studies        | 15 | Specify any assessment of risk of bias that may affect the cumulative evidence (e.g., publication bias, selective reporting within studies).                                                                           | 27        |
| Additional analyses                | 16 | Describe methods of additional analyses (e.g., sensitivity or subgroup analyses, meta-regression), if done, indicating which were pre-specified.                                                                       | N/A       |
| <b>RESULTS</b>                     |    |                                                                                                                                                                                                                        |           |
| Study selection                    | 17 | Give numbers of studies screened, assessed for eligibility, and included in the review, with reasons for exclusions at each stage, ideally with a flow diagram.                                                        | 9         |
| Study characteristics              | 18 | For each study, present characteristics for which data were extracted (e.g., study size, PICOS, follow-up period) and provide the citations.                                                                           | 10-12     |
| Risk of bias within studies        | 19 | Present data on risk of bias of each study and, if available, any outcome level assessment (see item 12).                                                                                                              |           |
| Results of individual studies      | 20 | For all outcomes considered (benefits or harms), present, for each study: (a) simple summary data for each intervention group (b) effect estimates and confidence intervals, ideally with a forest plot.               | 13-14     |
| Synthesis of results               | 21 | Present results of each meta-analysis done, including confidence intervals and measures of consistency.                                                                                                                | N/A       |
| Risk of bias across studies        | 22 | Present results of any assessment of risk of bias across studies (see Item 15).                                                                                                                                        | N/A       |
| Additional analysis                | 23 | Give results of additional analyses, if done (e.g., sensitivity or subgroup analyses, meta-regression [see Item 16]).                                                                                                  | 16-17     |
| <b>DISCUSSION</b>                  |    |                                                                                                                                                                                                                        |           |
| Summary of evidence                | 24 | Summarize the main findings including the strength of evidence for each main outcome; consider their relevance to key groups (e.g., healthcare providers, users, and policy makers).                                   | 16, 18-27 |

1  
2  
3  
4  
5  
6  
7  
8  
9  
10  
11  
12  
13  
14  
15  
16  
17  
18  
19  
20  
21  
22  
23  
24  
25  
26  
27  
28  
29  
30  
31  
32  
33  
34  
35  
36  
37  
38  
39  
40  
41  
42  
43  
44  
45  
46  
47

|                |    |                                                                                                                                                               |       |
|----------------|----|---------------------------------------------------------------------------------------------------------------------------------------------------------------|-------|
| Limitations    | 25 | Discuss limitations at study and outcome level (e.g., risk of bias), and at review-level (e.g., incomplete retrieval of identified research, reporting bias). | 27    |
| Conclusions    | 26 | Provide a general interpretation of the results in the context of other evidence, and implications for future research.                                       | 27-28 |
| <b>FUNDING</b> |    |                                                                                                                                                               |       |
| Funding        | 27 | Describe sources of funding for the systematic review and other support (e.g., supply of data); role of funders for the systematic review.                    | 28    |

For peer review only
