# Supplementary material for: Experiences of women with cardiac disease in pregnancy: a systematic review and metasynthesis
Source: PubMed Central journal article supplement — BMJ Open. 2018 Sep 28;8(9):e022755. doi: 10.1136/bmjopen-2018-022755 (PMC6169742; doi:10.1136/bmjopen-2018-022755), 2018-09-28
Supplement: bmjopen-2018-022755supp001.pdf [file bmjopen-2018-022755supp001.pdf]

Supplementary data-

Appendix 1: Full search strategy

| Bibliographic Database                                 | Search strategy                                                                                                                                                                                                                                                                                                                                                                                                                                                                                                                                                                                                                                                                                                                                                                                                                                                                                                                                                                                                                                                                                                                                                                                                                                                                                                                                                                                                                                                                                                                                                                                                                                                                                                                                                                                                                                                                                                                                                                                                                                                                                                                                                                           |
|--------------------------------------------------------|-------------------------------------------------------------------------------------------------------------------------------------------------------------------------------------------------------------------------------------------------------------------------------------------------------------------------------------------------------------------------------------------------------------------------------------------------------------------------------------------------------------------------------------------------------------------------------------------------------------------------------------------------------------------------------------------------------------------------------------------------------------------------------------------------------------------------------------------------------------------------------------------------------------------------------------------------------------------------------------------------------------------------------------------------------------------------------------------------------------------------------------------------------------------------------------------------------------------------------------------------------------------------------------------------------------------------------------------------------------------------------------------------------------------------------------------------------------------------------------------------------------------------------------------------------------------------------------------------------------------------------------------------------------------------------------------------------------------------------------------------------------------------------------------------------------------------------------------------------------------------------------------------------------------------------------------------------------------------------------------------------------------------------------------------------------------------------------------------------------------------------------------------------------------------------------------|
| <p><b>MEDLINE</b><br/><b>1996 – 6 October 2016</b></p> | <ol style="list-style-type: none"> <li>1 Cardiac disease.mp. or Heart Diseases</li> <li>2 Postoperative Complications/ or Heart Transplantation/ or heart transplant.mp. or Heart Failure</li> <li>3 Rheumatic heart disease.mp. or Rheumatic Heart Disease</li> <li>4 Adult/ or Hypertension, Pulmonary/ or Heart Defects, Congenital/ or congenital heart disease.mp. or Cardiac Surgical Procedures/</li> <li>5 Hypertension/ or Cardiomyopathies/ or Cardiovascular Diseases/ or Arrhythmias, Cardiac/ or Heart Defects, Congenital/ or Heart Diseases/ or Cardiomyopathy, Hypertrophic/ or genetic cardiac disease.mp.</li> <li>6 Arrhythmias, Cardiac/ or Myocardial Infarction/ or Atrial Fibrillation/ or chronic arrhythmia.mp. or Tachycardia, Supraventricular/ or Coronary Disease/</li> <li>7 1 or 2 or 3 or 4 or 5 or 6</li> <li>8 Pregnancy Complications, Hematologic/ or Pregnancy, Unplanned/ or Pregnancy Maintenance/ or Pregnancy, High-Risk/ or Pregnancy, Unwanted/ or Pregnancy in Adolescence/ or Pregnancy, Multiple/ or Pregnancy Outcome/ or Pregnancy Complications/ or Pregnancy/ or Hypertension, Pregnancy-Induced/ or pregnancy.mp. or Pregnancy in Diabetics/ or Pregnancy, Abdominal/ or Pregnancy Complications, Cardiovascular/</li> <li>9 Pregnant women.mp. or Pregnant Women/</li> <li>10 Infant Mortality/ or Pregnancy/ or Maternal Health Services/ or Prenatal Care/ or Pregnancy Complications/ or antenatal care.mp. or Socioeconomic Factors/</li> <li>11 Perinatal care.mp. or Perinatal Care/</li> <li>12 birth.mp. or Parturition/</li> <li>13 postpartum.mp. or Postpartum Period</li> <li>14 8 or 9 or 10 or 11 or 12 or 13</li> <li>15 Decision making.mp. or Decision Making/</li> <li>16 Shared decision making.mp.</li> <li>17 "Delivery of Health Care"/ or Decision Making/ or Physician-Patient Relations/ or Patient-Centered Care/ or patient centered care.mp.</li> <li>18 15 or 16 or 17</li> <li>19 midwives.mp. or Midwifery/</li> <li>20 General practitioner.mp. or General Practitioners/</li> <li>21 Primary physician.mp.</li> <li>22 Obstetrics/ or obstetrician.mp. or Practice Patterns, Physicians'/</li> </ol> |

|                                                                   |                                                                                                                                                                                                                                                                                                                                                                                                                                                                                                                                                                                                                                                                                                                                                                                                                                                                                                                                                                                                                                                                                                                                                                                                                                                                                                                                                                                                                                                                   |
|-------------------------------------------------------------------|-------------------------------------------------------------------------------------------------------------------------------------------------------------------------------------------------------------------------------------------------------------------------------------------------------------------------------------------------------------------------------------------------------------------------------------------------------------------------------------------------------------------------------------------------------------------------------------------------------------------------------------------------------------------------------------------------------------------------------------------------------------------------------------------------------------------------------------------------------------------------------------------------------------------------------------------------------------------------------------------------------------------------------------------------------------------------------------------------------------------------------------------------------------------------------------------------------------------------------------------------------------------------------------------------------------------------------------------------------------------------------------------------------------------------------------------------------------------|
|                                                                   | <p>23 cardiologist.mp.</p> <p>24 Family Practice/ or Allied Health Personnel/ or allied health professional.mp.</p> <p>25 19 or 20 or 21 or 22 or 23 or 24</p> <p>26 7 and 14 and 18 and 25</p>                                                                                                                                                                                                                                                                                                                                                                                                                                                                                                                                                                                                                                                                                                                                                                                                                                                                                                                                                                                                                                                                                                                                                                                                                                                                   |
| <p><b>EMBASE:</b></p> <p><b>1996 - 6 October 2016</b></p>         | <p>1 cardiac disease.mp.</p> <p>2 rheumatic heart disease.mp. or rheumatic heart disease/</p> <p>3 congenital heart disease.mp. orexp congenital heart disease/</p> <p>4 Arrhythmias.mp. or heart arrhythmia/</p> <p>5 1 and 2 and 3 and 4</p> <p>6 pregnant women.mp. or pregnant woman/</p> <p>7 pregnancy Complications.mp. or pregnancy complication/</p> <p>8 infant Mortality.mp. or infant mortality/</p> <p>9 perinatal care.mp. or perinatal care/</p> <p>10 birth/</p> <p>11 postpartum pain/ or postpartum hemorrhage/ or postpartum.mp.</p> <p>12 6 and 7 and 8 and 9 and 10 and 11</p> <p>13 decision making.mp. or decision making/</p> <p>14 medical decision making/ or doctor patient relation/ or decision making/ or patient participation/ or informed consent/ or shared decision making.mp. or interpersonal communication/</p> <p>15 13 and 14</p> <p>16 midwives.mp. or midwife/</p> <p>17 general practitioner.mp. or general practitioner/</p> <p>18 general practitioner/ or primary health care/ or general practice/ or primary physician.mp.</p> <p>19 obstetrics/ or obstetrician/ or pregnancy/ or pregnancy complication/</p> <p>20 cardiologist/ or heart disease/</p> <p>21 family Practice.mp. or general practice/</p> <p>22 16 and 17 and 18 and 19 and 20</p> <p>23 21 and 22</p> <p>24 5 and 12 and 15 and 23</p> <p>25 limit 24 to ("qualitative (maximizes sensitivity)" and English and article and last 20 years)</p> |
| <p><b>CINAHL (EBSCO)</b></p> <p><b>1995 - 11 October 2016</b></p> | <p>S1" cardiac disease "</p> <p>S2 (MH "pregnancy") OR "pregnancy"</p> <p>S3 MH "decision making, patient") OR (MH "patient centered care") OR ""wom?n cent* care" OR "patient cent* care" OR "wom?n* experience" OR "shared decision making""</p> <p>S4 S1 AND S2 AND S3</p>                                                                                                                                                                                                                                                                                                                                                                                                                                                                                                                                                                                                                                                                                                                                                                                                                                                                                                                                                                                                                                                                                                                                                                                     |
| <p><b>PsycINFO (EBSCO)</b></p>                                    | <p>1. cardiac disease</p>                                                                                                                                                                                                                                                                                                                                                                                                                                                                                                                                                                                                                                                                                                                                                                                                                                                                                                                                                                                                                                                                                                                                                                                                                                                                                                                                                                                                                                         |

**1984 - 18 October 2016**

2. MH "Pregnancy") OR "pregnancy"
3. (MH "Decision Making, Patient") OR (MH "Patient Centered Care") OR ""wom?n cent\* care" OR "patient cent\* care" OR "wom?n\* experience" OR "shared decision making""
4. 1 AND 2 AND 3
